# Supplementary material for: Flavonoids and Terpenoids with PTP-1B Inhibitory Properties from the Infusion of Salvia amarissima Ortega
Source: PubMed Central journal article supplement (PMC7435600; doi:10.3390/molecules25153530), 2020-08-01
Supplement: molecules-25-03530-s001.pdf [file molecules-25-03530-s001.pdf]

## SUPPLEMENTARY MATERIALS

### Flavonoids and Terpenoids with PTP-1B Inhibitory Properties from the Infusion of *Salvia amarissima* Ortega#

Eric Salinas-Arellano<sup>1,#</sup>, Araceli Pérez-Vásquez<sup>1</sup>, Isabel Rivero-Cruz<sup>1</sup>, Rafael Torres-Colin<sup>2</sup>, Martin González Andrade<sup>3</sup>, Manuel Rangel-Grimaldo<sup>1</sup> and Rachel Mata<sup>1,\*</sup>

<sup>1</sup> Facultad de Química, Universidad Nacional Autónoma de México, Mexico City 04510, Mexico; ersalinass@hotmail.com (E.A.-S.); perezva@unam.mx (A.P.-V.); riveroic@unam.mx (I.R.-C.); manuel\_erg\_p9@hotmail.com (M.R.-G.); rachel@unam.mx (R.M.)

<sup>2</sup> Instituto de Biología, Universidad Nacional Autónoma de México, Mexico City 04510, Mexico; rafael.torres@ib.unam.mx (R.T.-C.)

<sup>3</sup> Facultad de Medicina, Universidad Nacional Autónoma de México, Mexico City 04510, Mexico; martin@bq.unam.mx (M.G.A.)

\* Correspondence: rachel@unam.mx; Tel.: + 52-55-56225289

#Taken in part from the PhD thesis of Eric Salinas-Arellano

## Contents

### Spectroscopic and spectrometric data of compounds (1–6)

Figure S1. <sup>1</sup>H NMR spectrum of Amarisolide (compound **1**, 400 MHz, CD<sub>3</sub>OD)

Figure S2. <sup>13</sup>C NMR spectrum of Amarisolide (compound **1**, 100 MHz, CD<sub>3</sub>OD)

Figure S3. <sup>1</sup>H NMR spectrum of 5,6,4'-Trihidroxy-7,3'-dimethoxyflavone (compound **2**, 700 MHz, CD<sub>3</sub>OD)

Figure S4. <sup>13</sup>C NMR spectrum of 5,6,4'-Trihidroxy-7,3'-dimethoxyflavone (compound **2**, 175 MHz, CD<sub>3</sub>OD)

Figure S5. <sup>1</sup>H NMR spectrum of 6-Hydroxyluteolin (compound **3**, 700 MHz, CD<sub>3</sub>OD)

Figure S6. <sup>13</sup>C NMR spectra of 6-Hydroxyluteolin (compound **3**, 175 MHz, CD<sub>3</sub>OD)

Figure S7. <sup>1</sup>H NMR spectrum of Rutin (compound **4**, 400 MHz, CD<sub>3</sub>OD)

Figure S8. <sup>1</sup>H NMR spectrum of Rosmarinic acid (compound **5**, 700 MHz, CD<sub>3</sub>OD)

Figure S9. <sup>13</sup>C NMR spectrum of Rosmarinic acid (compound **5**, 175 MHz, CD<sub>3</sub>OD)

Figure S10. <sup>1</sup>H NMR spectrum of Isoquercitrin (compound **6**, 700 MHz, CD<sub>3</sub>OD)

Figure S11. <sup>13</sup>C NMR spectrum of Isoquercitrin (compound **6**, 175 MHz, CD<sub>3</sub>OD)

Figure S12. IR spectrum of Amarisolide G (compound **8a,b**)

Figure S13. <sup>1</sup>H NMR spectrum of Amarisolide G (compound **8a,b**, 700 MHz, DMSO-*d*<sub>6</sub>)

Figure S14. <sup>13</sup>C NMR spectrum of Amarisolide G (compound **8a,b**, 175 MHz, DMSO-*d*<sub>6</sub>)

Figure S15. <sup>1</sup>H-<sup>1</sup>H COSY spectrum of Amarisolide G (compound **8a,b**)

Figure S16. <sup>1</sup>H-<sup>13</sup>C HSQC spectrum of Amarisolide G (compound **8a,b**)

Figure S17. <sup>1</sup>H-<sup>13</sup>C HMBC spectrum of Amarisolide G (compound **8a,b**)

Figure S18. TOCSY spectrum of Amarisolide G (compound **8a,b**)

Figure S19. Total ion current chromatogram of the essential oil of *S. amarissima* (Sa-Batch 1). Peak identification: **10**, (*E*)-Pinocarvyl acetate; **11**, δ-elemene; **12**, α-bourbonene; **13**, β-caryophyllene; **14**, α-caryophyllene; **15**, germacrene D; **16**, β-selinene; **17**, spathulenol.

Figure S20. Total ion current chromatogram of the essential oil of *S. amarissima* (Sa-Batch 1). Peak identification: **9**, 3-Methoxy-*p*-cymene; **10**, (*E*)-pinocarvyl acetate; **12**, α-bourbonene; **13**, β-caryophyllene; **14**, α-caryophyllene; **15**, germacrene D; **16**, β-selinene; **17**, spathulenol.

Figure S21. EIMS spectrum of 3-Methoxy-*p*-cymene (compound **9**)  
Figure S22. EIMS spectrum of (*E*)-Pinocarvyl acetate (compound **10**)  
Figure S23. EIMS spectrum of  $\delta$ -Elemene (compound **11**)  
Figure S24. EIMS spectrum of  $\alpha$ -Bourbonene (compound **12**)  
Figure S25. EIMS spectrum of  $\beta$ -Caryophyllene (compound **13**)  
Figure S26. EIMS spectrum of  $\alpha$ -Caryophyllene (compound **14**)  
Figure S27. EIMS spectrum of Germacrene D (compound **15**)  
Figure S28. EIMS spectrum of  $\beta$ -Selinene (compound **16**)  
Figure S29. EIMS spectrum of Spathulenol (compound **17**)  
Figure S30. Residues of interaction to 4 Å of compounds **1,7** and **UA** at the catalytic site of PTP1B.  
Figure S31. Residues of interaction to 4 Å of compounds **1, 7** and **UA** at the allosteric site of PTP1B.

## Spectroscopic and spectrometric data of compounds (1–7)

*Amarisolide (1)*.  $^1\text{H-NMR}$  (400 MHz,  $\text{CD}_3\text{OD}$ )  $\delta_{\text{H}}$  (ppm): 7.35 (dd,  $J = 1.7$  Hz, H-15), 7.28 (dd,  $J = 1.3$  Hz, H-16), 6.76 (d,  $J = 6.3$  Hz, H-3), 6.33 (dd,  $J = 1.8, 0.9$  Hz, H-14), 4.62 (dt,  $J = 6.4, 2.2$  Hz, H-2), 4.46 (d,  $J = 7.7$  Hz, H-1'), 4.41 (d,  $J = 8.2$  Hz, H-19a), 4.02 (dd,  $J = 8.2, 2.0$  Hz, H-19b), 3.83 (dd,  $J = 11.8, 2.3$  Hz, H-6'a), 3.51 (dd,  $J = 11.8, 6.6$  Hz, H-6'b), 3.33 (d,  $J = 9.0$  Hz, H-3'), 3.27 (m, H-5'), 3.14 (m, H-2', H-4'), 2.64 (td,  $J = 13.6, 4.4$  Hz, H-12a), 2.47 (d,  $J = 13.4$  Hz, H-10), 2.33 (td,  $J = 13.5, 5.0$  Hz, H-12b), 1.86 (m, H-6a), 1.79 (ddd,  $J = 12.2, 8.9, 4.8$  Hz, H-1a), 1.63 (m, H-7), 1.61 (m, H-8), 1.41 (m, H-11), 1.37 (m, H-1b), 1.30 (m, H-6b), 0.88 (d,  $J = 6.7$  Hz, H-17), 0.61 (s, H-20);  $^{13}\text{C-NMR}$  (100 MHz,  $\text{CD}_3\text{OD}$ )  $\delta_{\text{C}}$  (ppm): 170.2 (C-18), 143.3 (C-4), 142.4 (C-15), 138.3 (C-16), 130.3 (C-3), 125.7 (C-13), 110.8 (C-14), 101.9 (C-1'), 76.9 (C-5'), 76.7 (C-3'), 74.1 (C-2'), 71.2 (C-19), 70.5 (C-4'), 69.7 (C-2), 61.6 (C-6'), 45.7 (C-5), 39.6 (C-10), 37.8 (C-8, C-9), 33.5 (C-6), 27.4 (C-7), 26.1 (C-1), 26.0 (C-11), 17.0 (C-12), 16.6 (C-20), 14.5 (C-17).

*5,6,4'-Trihydroxy-7,3'-dimethoxyflavone (2)*.  $^1\text{H-NMR}$  (700 MHz,  $\text{CD}_3\text{OD}$ )  $\delta_{\text{H}}$  (ppm): 7.59 (dd,  $J = 8.3, 2.2$  Hz, H-6'), 7.57 (d,  $J = 2.1$  Hz, H-2'), 6.98 (d,  $J = 8.2$  Hz, H-5'), 6.91 (s, H-8), 6.71 (s, H-3), 4.04 (s, 7-OCH<sub>3</sub>), 4.02 (s, 3'-OCH<sub>3</sub>);  $^{13}\text{C-NMR}$  (175 MHz,  $\text{CD}_3\text{OD}$ )  $\delta_{\text{C}}$  (ppm): 182.9 (C-4), 165.1 (C-2), 154.5 (C-7), 150.7 (C-9), 150.6 (C-4'), 148.1 (C-5), 145.8 (C-5'), 130.1 (C-6), 122.4 (C-1'), 120.4 (C-2'), 115.4 (C-3'), 112.6 (C-6'), 105.2 (C-10), 102.5 (C-3), 90.6 (C-8), 55.5 (7-OCH<sub>3</sub>), 55.3 (3'-OCH<sub>3</sub>) [11].

*6-hydroxyluteolin (3)*.  $^1\text{H-NMR}$  (700 MHz,  $\text{CD}_3\text{OD}$ )  $\delta_{\text{H}}$  (ppm): 7.42 (dd,  $J = 8.4, 2.3$  Hz, H-6'), 7.40 (d,  $J = 2.3$  Hz, H-2'), 6.88 (d,  $J = 8.4$  Hz, H-5'), 6.83 (s, H-3), 6.58 (s, H-8);  $^{13}\text{C-NMR}$  (175 MHz,  $\text{CD}_3\text{OD}$ )  $\delta_{\text{C}}$  (ppm): 183.9 (C-4), 166.8 (C-2), 155.3 (C-9), 151.5 (C-7, C-4'), 147.7 (C-5), 146.9 (C-3'), 131.2 (C-6), 121.6 (C-1'), 120.1 (C-6'), 116.6 (C-5'), 113.0 (C-2'), 106.1 (C-10), 102.6 (C-3), 91.8 (C-8).

*Rutin (4)*.  $^1\text{H-NMR}$  (400 MHz,  $\text{CD}_3\text{OD}$ )  $\delta_{\text{H}}$  (ppm): 7.65 (d,  $J = 2.2$  Hz, H-2'), 7.62 (dd,  $J = 8.4, 2.2$  Hz, H-6'), 6.86 (d,  $J = 8.4$  Hz, H-5'), 6.38 (d,  $J = 2.1$  Hz, H-6), 6.19 (d,  $J = 2.1$  Hz, H-8), 5.08 (d,  $J = 7.6$  Hz, H-1''), 4.50 (d,  $J = 1.7$  Hz, H-1'''), 3.79 (dd,  $J = 11.0, 1.5$  Hz, H-5''), 3.61 (dd,  $J = 3.5, 1.7$  Hz, 5'''), 3.35-3.54 (m, H-2'', H-3'', H-4'', H-6'', H-2''''-H-4'''), 1.11 (d,  $J = 6.2$  Hz, 6''').

*Rosmarinic acid (5)*.  $^1\text{H-NMR}$  (700 MHz,  $\text{CD}_3\text{OD}$ )  $\delta_{\text{H}}$  (ppm): 7.53 (d,  $J = 15.9$  Hz, H-7), 7.05 (d,  $J = 2.1$  Hz, H-2), 6.94 (dd,  $J = 8.2, 2.1$  Hz, H-6), 6.79 (d,  $J = 8.1$  Hz, H-5), 6.78 (d,  $J = 2.2$  Hz, H-2'), 6.70 (d,  $J = 8.0$  Hz, H-5'), 6.65 (dd,  $J = 8.1, 2.0$  Hz, H-6'), 6.29 (d,  $J = 15.8$  Hz, H-8), 5.10 (d,  $J = 8.0$  Hz, H-8'), 3.10 (dd,  $J = 14.3, 3.2$  Hz, H-7'a), 2.95 (dd,  $J = 14.3, 9.5$  Hz, H-7'b);  $^{13}\text{C-NMR}$  (175 MHz,  $\text{CD}_3\text{OD}$ )  $\delta_{\text{C}}$  (ppm): 177.0 (C-9'), 169.0 (C-9), 149.3 (C-4), 146.6 (C-7), 146.6 (C-3), 145.8 (C-3'), 144.7 (C-4'), 130.8 (C-1'), 127.8 (C-1), 122.8 (C-6), 121.6 (C-6'), 117.4 (C-2'), 116.3 (C-5'), 116.1 (C-5), 115.4 (C-2), 115.0 (C-8), 77.4 (C-8'), 38.5 (C-7'); ESI-MS  $m/z$  359.23  $[\text{M} - \text{H}]^-$ .

*Isoquercitrin (6)*.  $^1\text{H-NMR}$  (700 MHz,  $\text{CD}_3\text{OD}$ )  $\delta_{\text{H}}$  (ppm): 7.73 (d,  $J = 2.1$  Hz, H-2'), 7.60 (dd,  $J = 8.4, 2.1$  Hz, H-6'), 6.88 (dd,  $J = 8.4$  Hz, H-5'), 6.35 (d,  $J = 2.0$  Hz, H-8), 6.17 (d,  $J = 2.0$  Hz, H-6), 5.21 (d,  $J = 7.7$  Hz, H-1''), 3.70 (dd,  $J = 11.9, 2.4$  Hz, H-6a''), 3.60 (dd,  $J = 11.8, 5.2$  Hz, H-6b''), 3.50 (dd,  $J = 9.2, 7.8$  Hz, H-3''), 3.44 (t,  $J = 9.0$  Hz, H-5''), 3.24 (m, H-2'', H-4'');  $^{13}\text{C-NMR}$  (175 MHz,  $\text{CD}_3\text{OD}$ )  $\delta_{\text{C}}$  (ppm): 177.7 (C-4), 167.4 (C-7), 161.5 (C-5), 157.3 (C-2), 157.3 (C-9), 148.6 (C-4'), 144.6 (C-3'), 134.1 (C-3), 121.7 (C-6'), 121.7 (C-1'), 116.1 (C-2'), 114.6 (C-5'), 103.5 (C-1''), 103.2 (C-10), 99.4 (C-6), 94.0 (C-8), 77.0 (C-5''), 76.8 (C-2''), 74.3 (C-3''), 69.8 (C-4''), 61.1 (C-6'').

*Pedalitin (7)*. Yellow powder; m.p. 300–301 °C;  $R_T$  2.82 min; ESI-MS  $m/z$  315.48  $[\text{M} - \text{H}]^-$  [7].

Figure S1.  $^1\text{H}$  NMR spectrum of Amarisolide (compound **1**, 400 MHz,  $\text{CD}_3\text{OD}$ )

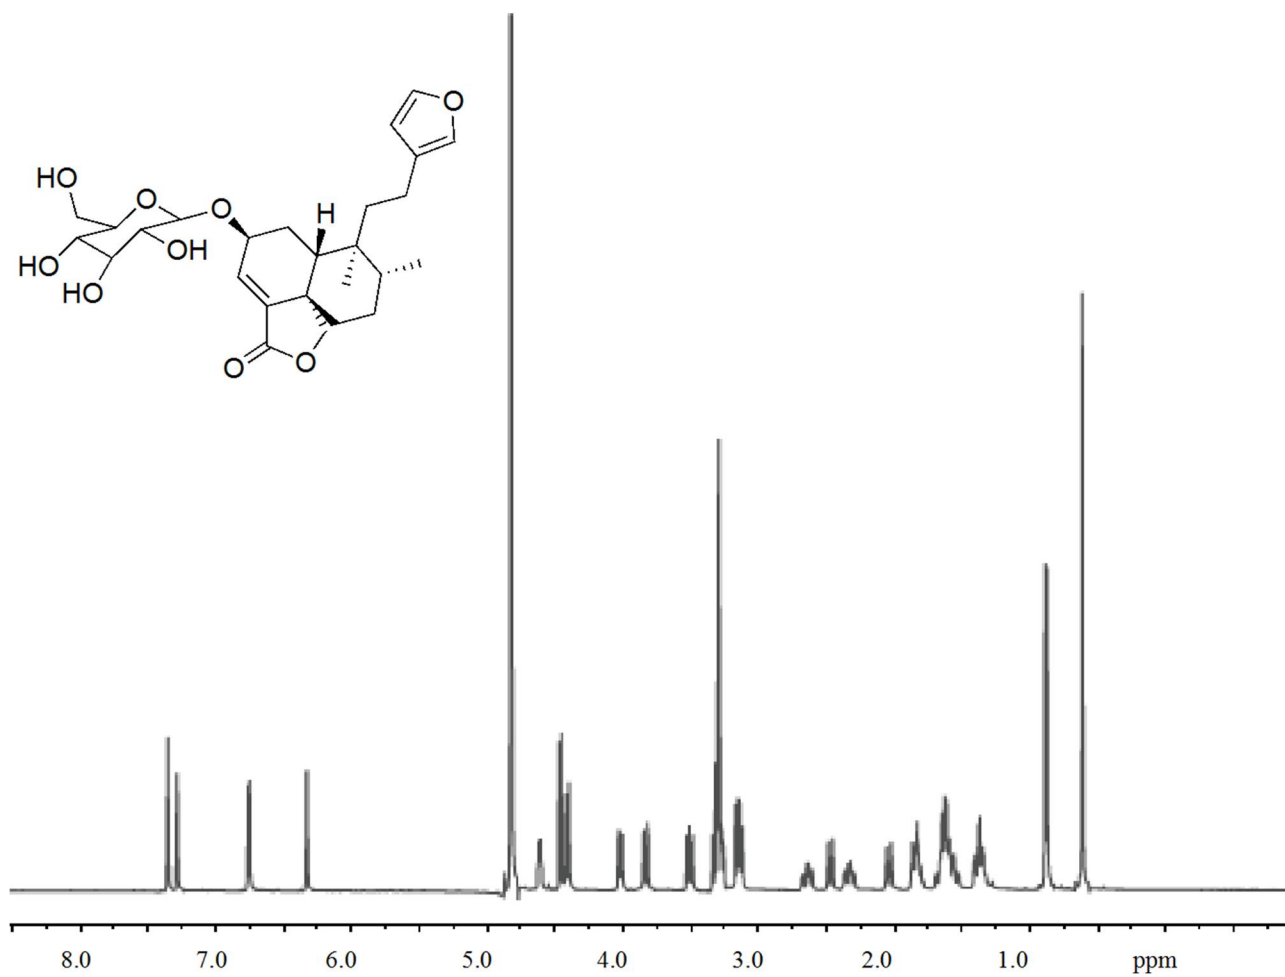

Figure S2.  $^{13}\text{C}$  NMR spectrum of Amarisolide (compound **1**, 100 MHz,  $\text{CD}_3\text{OD}$ )

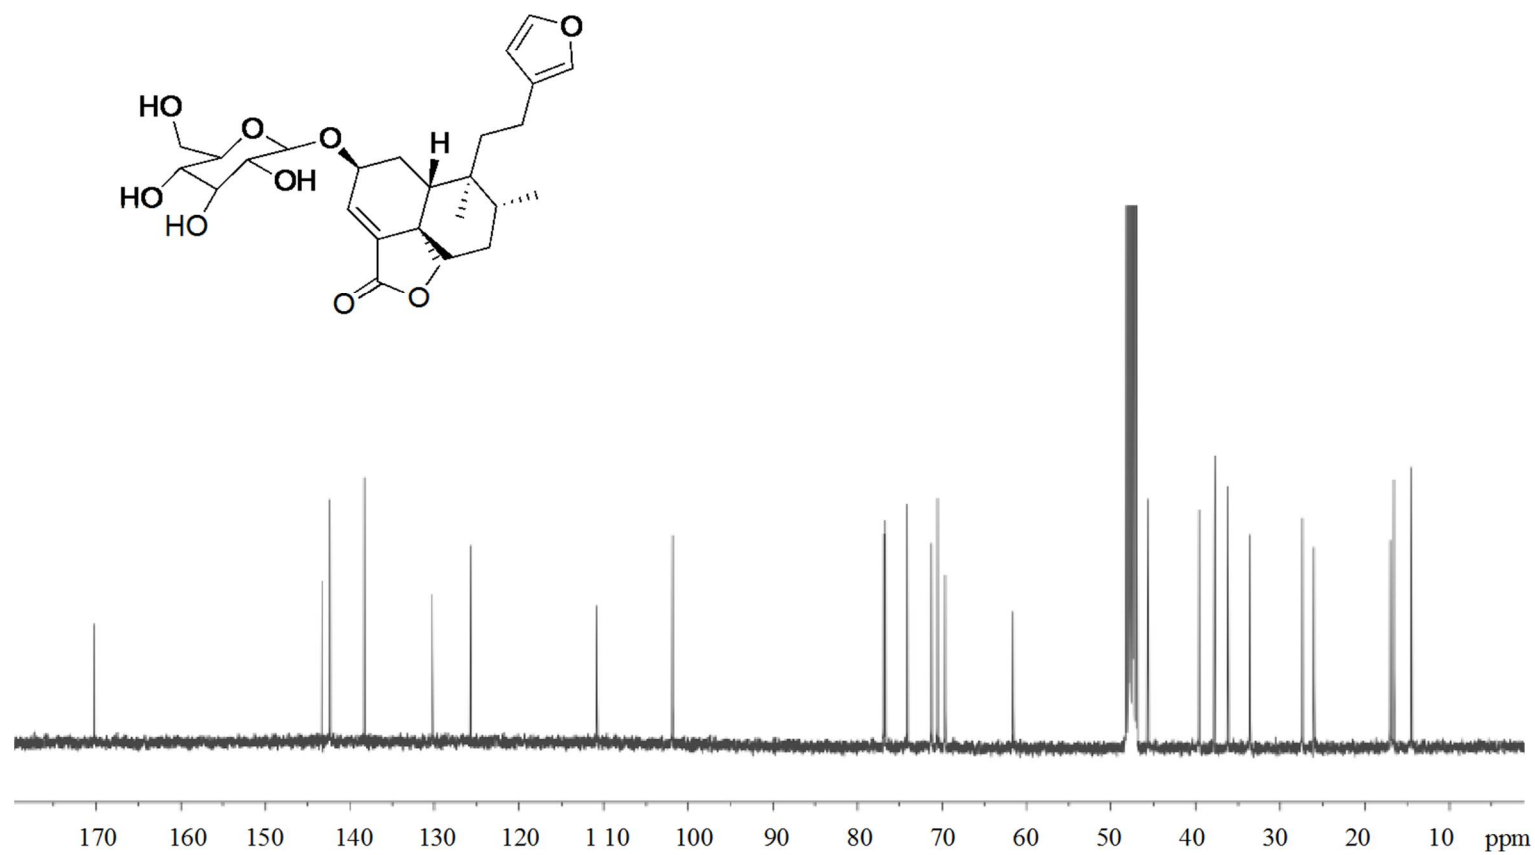

Figure S3.  $^1\text{H}$  NMR spectrum of 5,6,4'-Trihydroxy-7,3'-dimethoxyflavone (compound **2**, 700 MHz,  $\text{CD}_3\text{OD}$ )

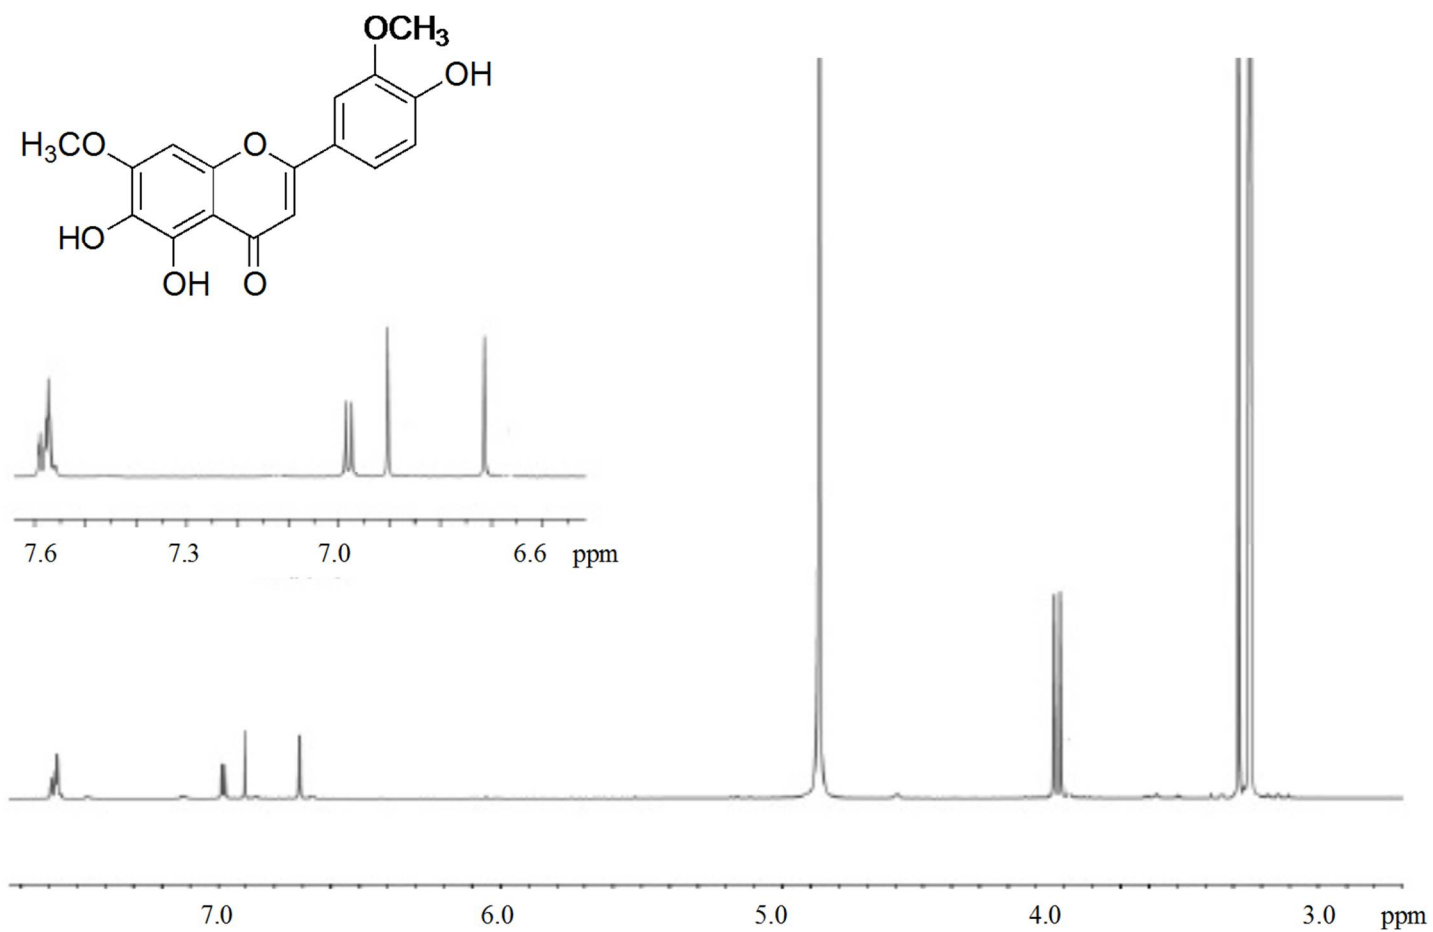



Figure S4.  $^{13}\text{C}$  NMR spectrum of 5,6,4'-Trihydroxy-7,3'-dimethoxyflavone (compound **2**, 175 MHz,  $\text{CD}_3\text{OD}$ )

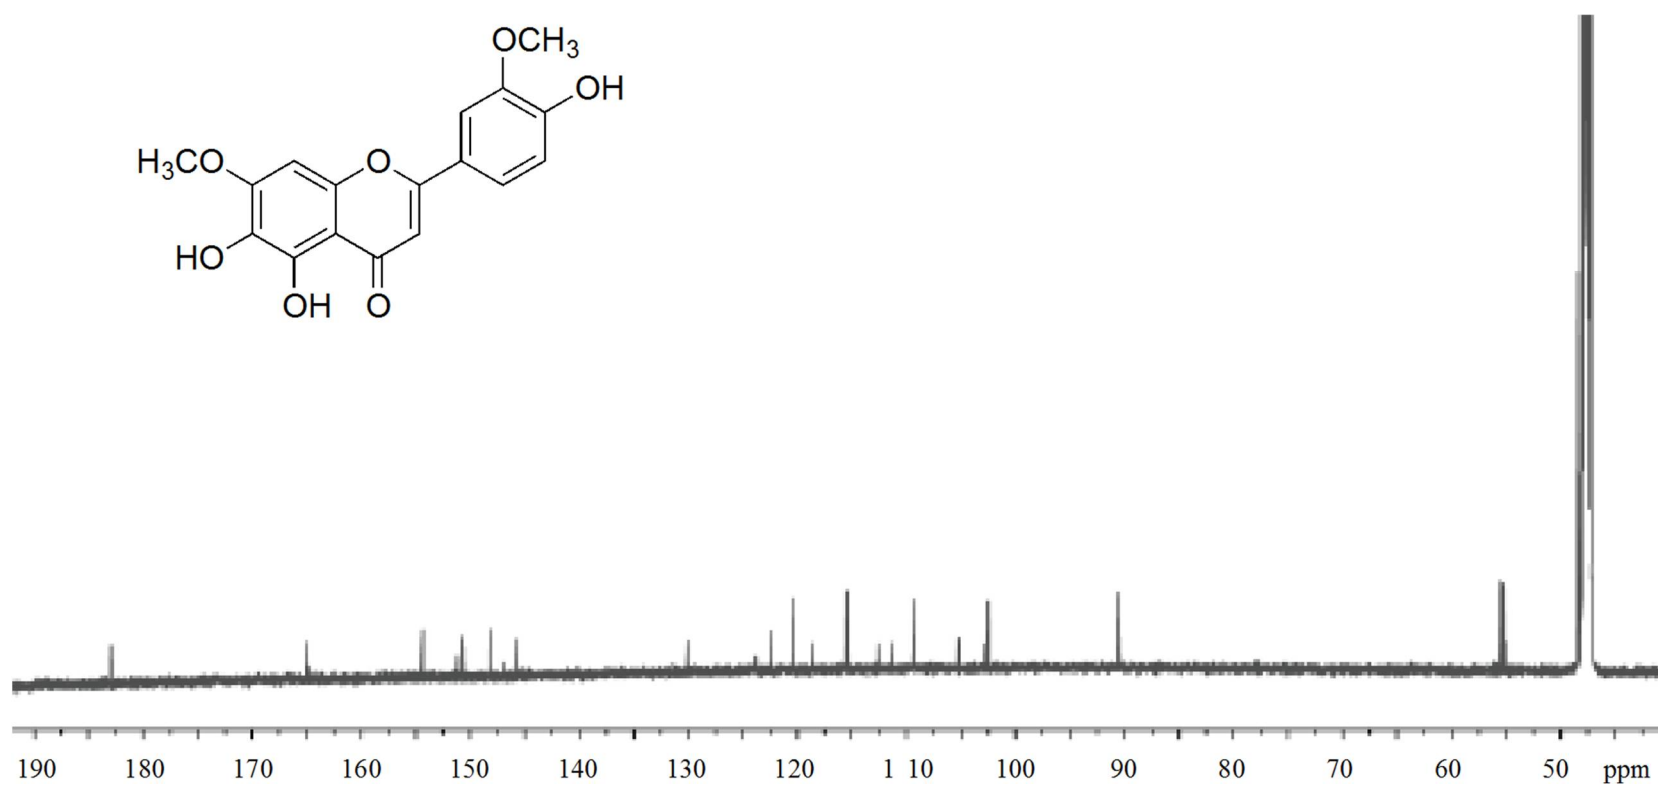

Figure S5.  $^1\text{H}$  NMR spectrum of 6-Hydroxyluteolin (compound **3**, 700 MHz,  $\text{CD}_3\text{OD}$ )

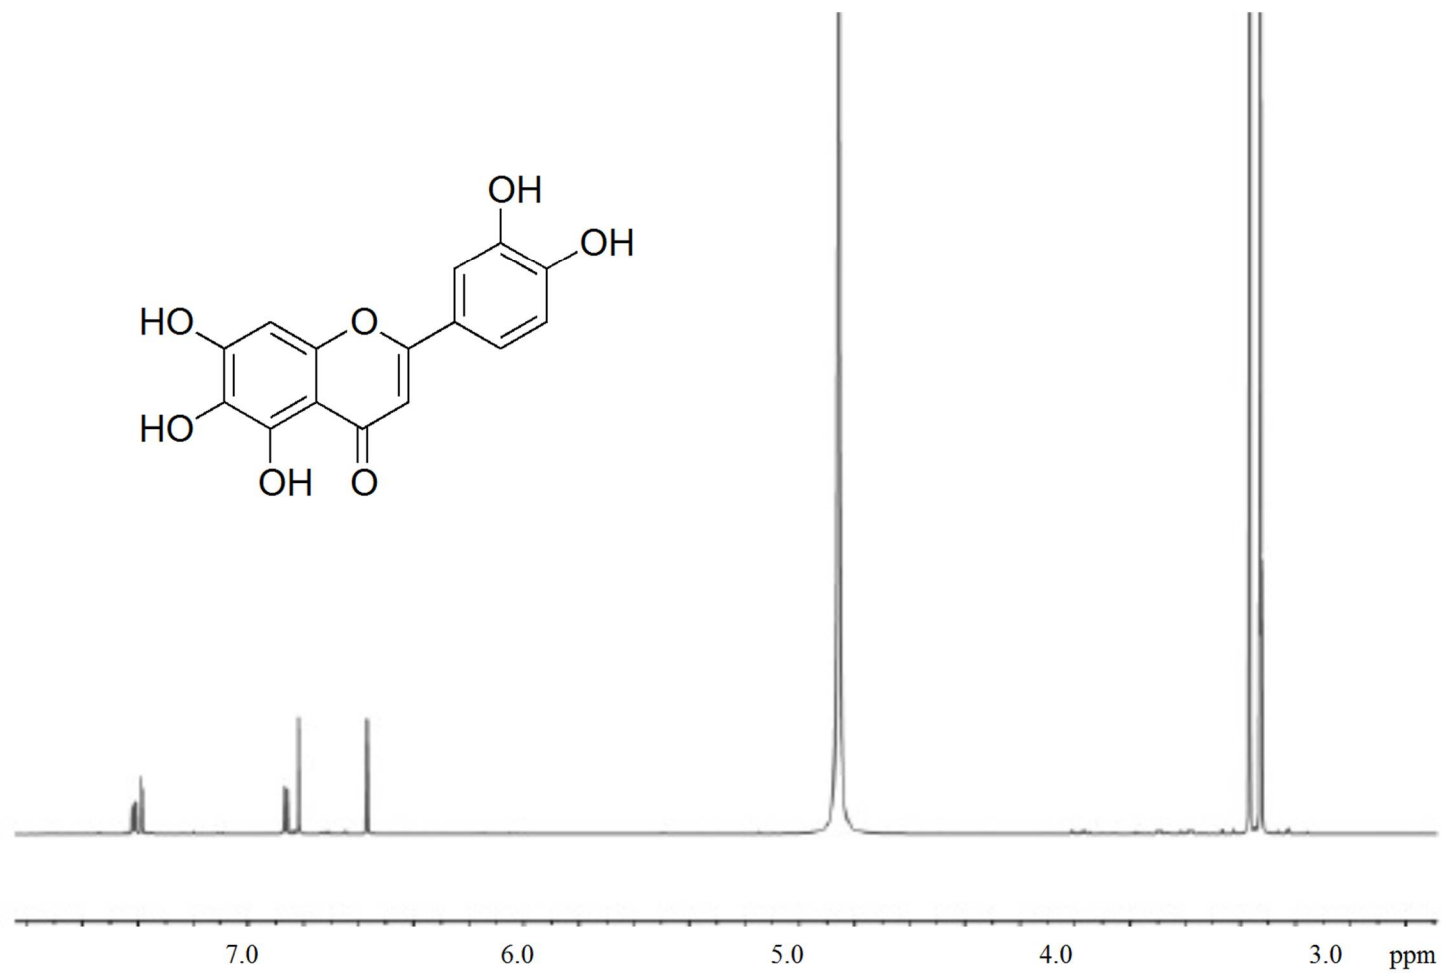

Figure S6.  $^{13}\text{C}$  NMR spectra of 6-Hydroxyluteolin (compound **3**, 175 MHz,  $\text{CD}_3\text{OD}$ )

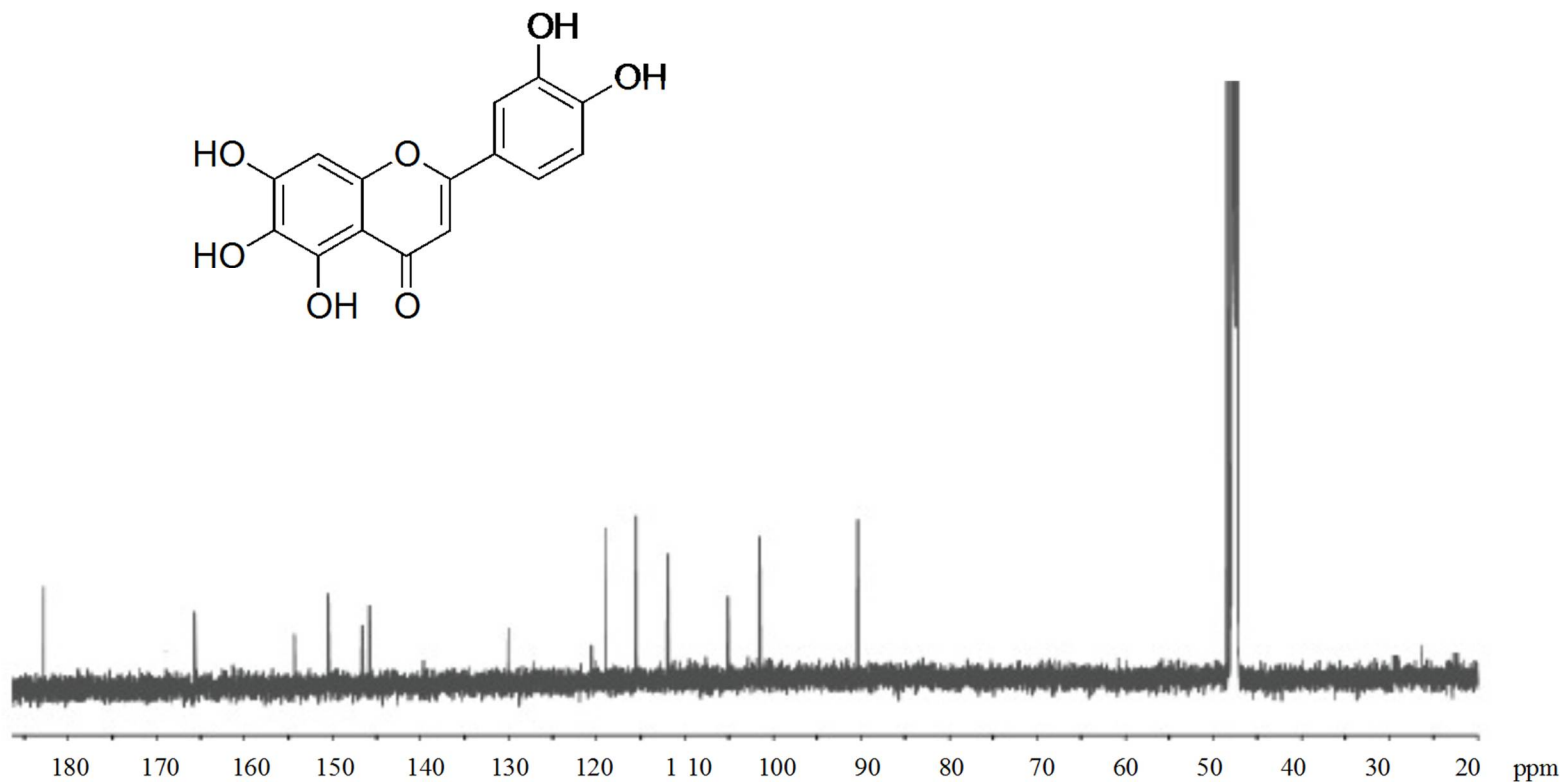

Figure S7.  $^1\text{H}$  NMR spectrum of Rutin (compound 4, 400 MHz,  $\text{CD}_3\text{OD}$ )

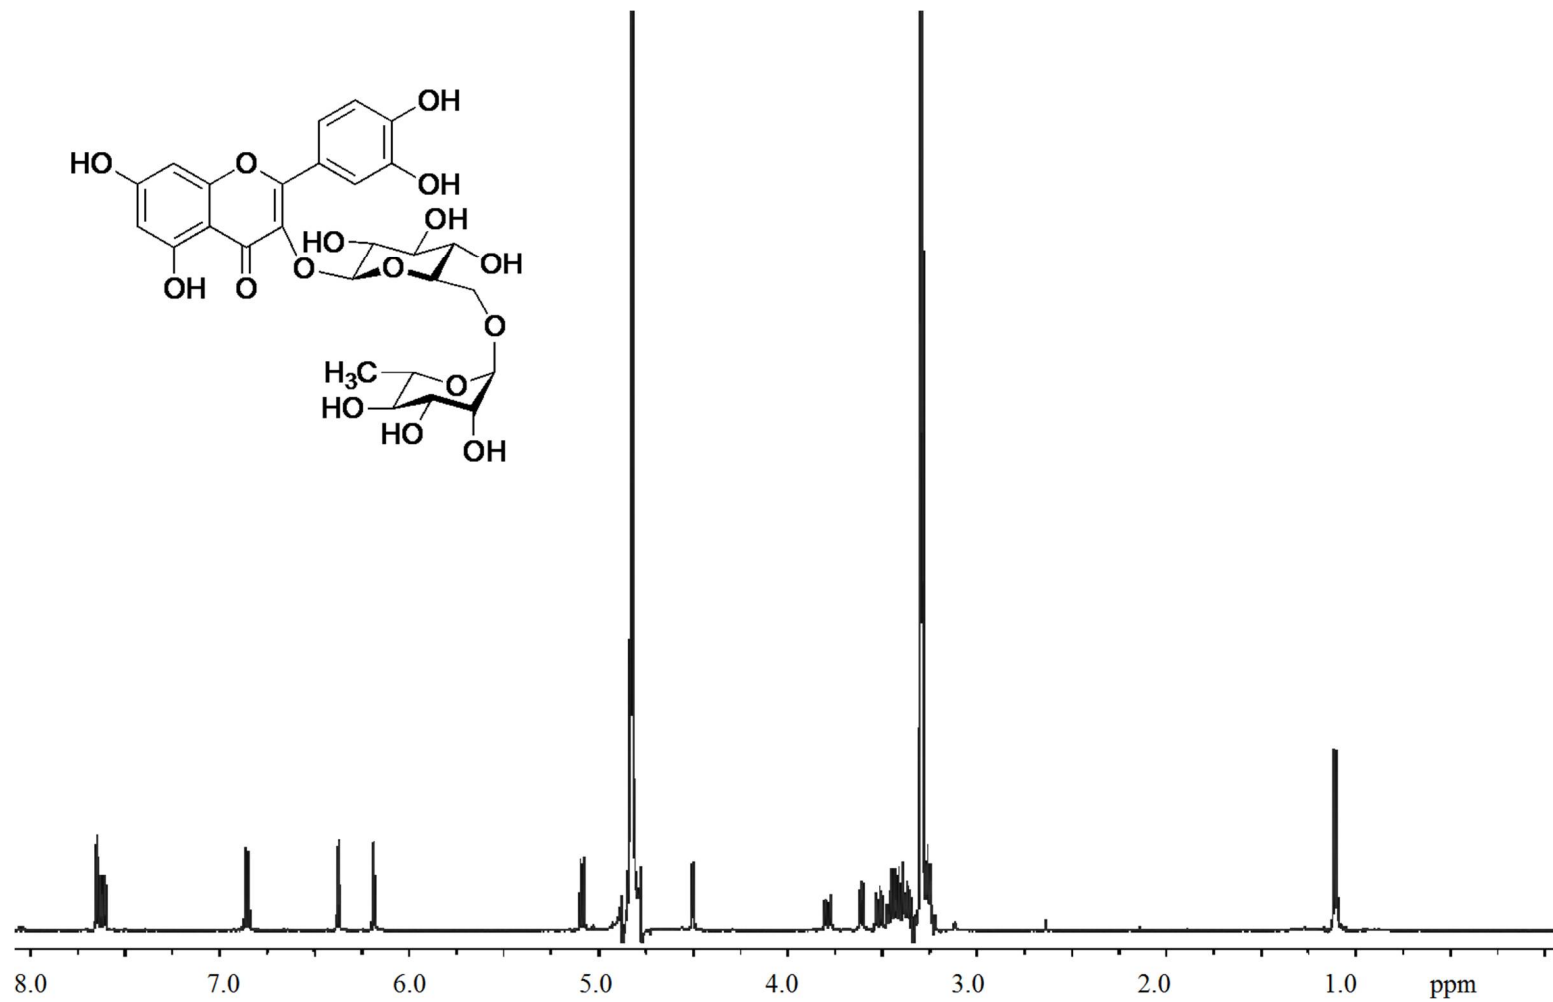

Figure S8.  $^1\text{H}$  NMR spectrum of Rosmarinic acid (compound **5**, 700 MHz,  $\text{CD}_3\text{OD}$ )

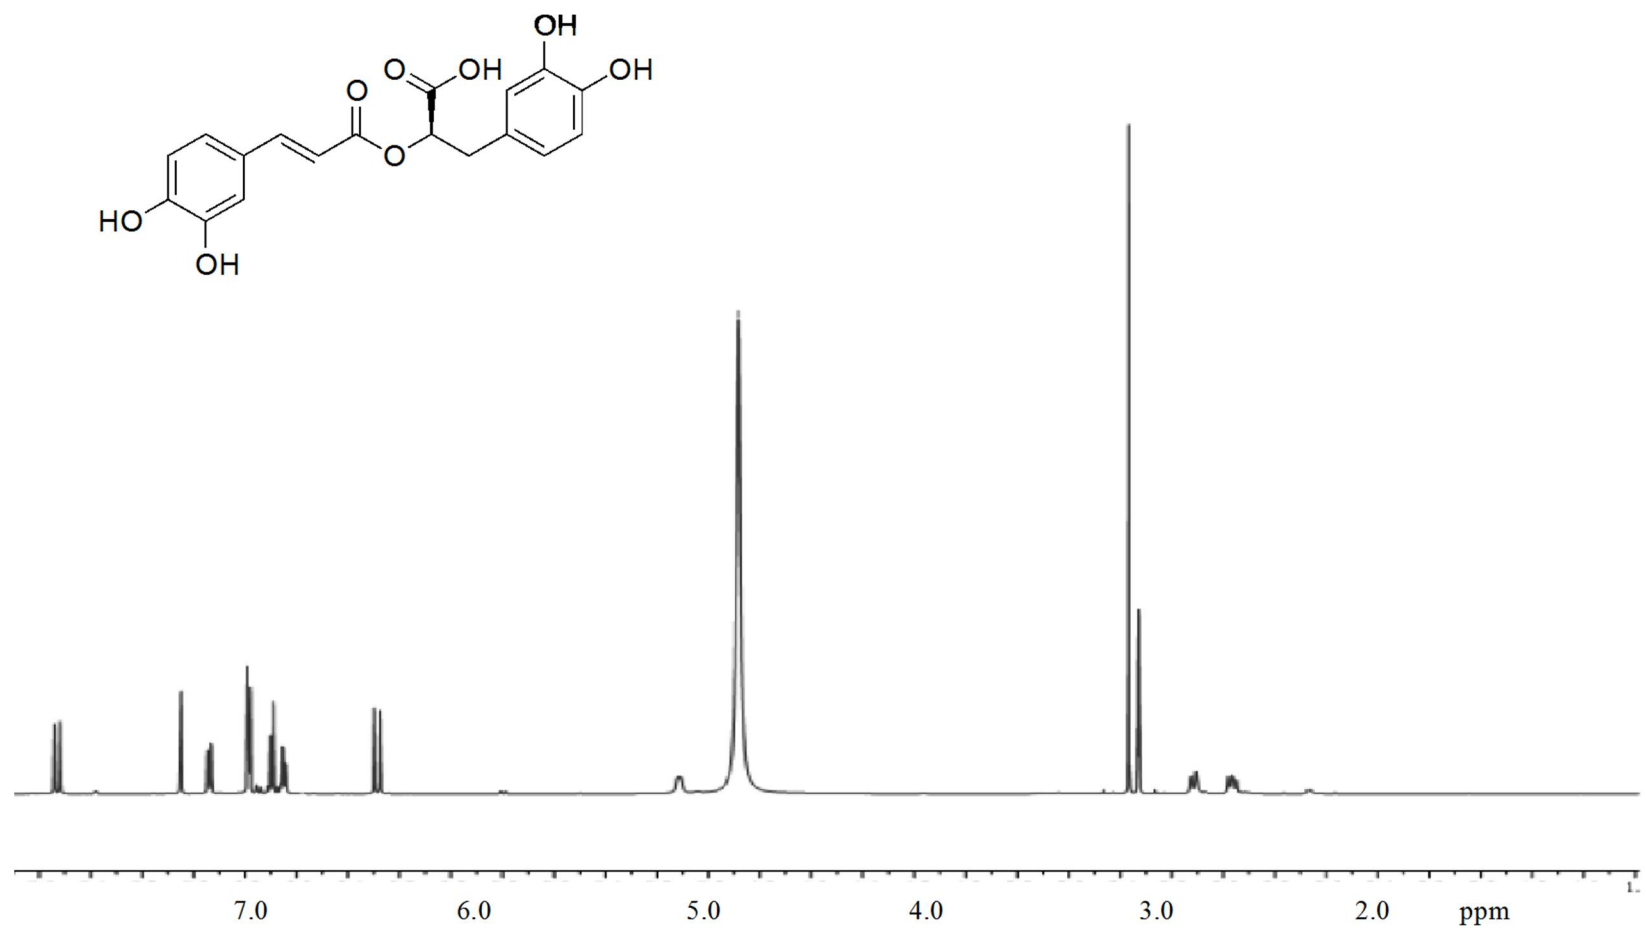

Figure S9.  $^{13}\text{C}$  NMR spectrum of Rosmarinic acid (compound **5**, 175 MHz,  $\text{CD}_3\text{OD}$ )

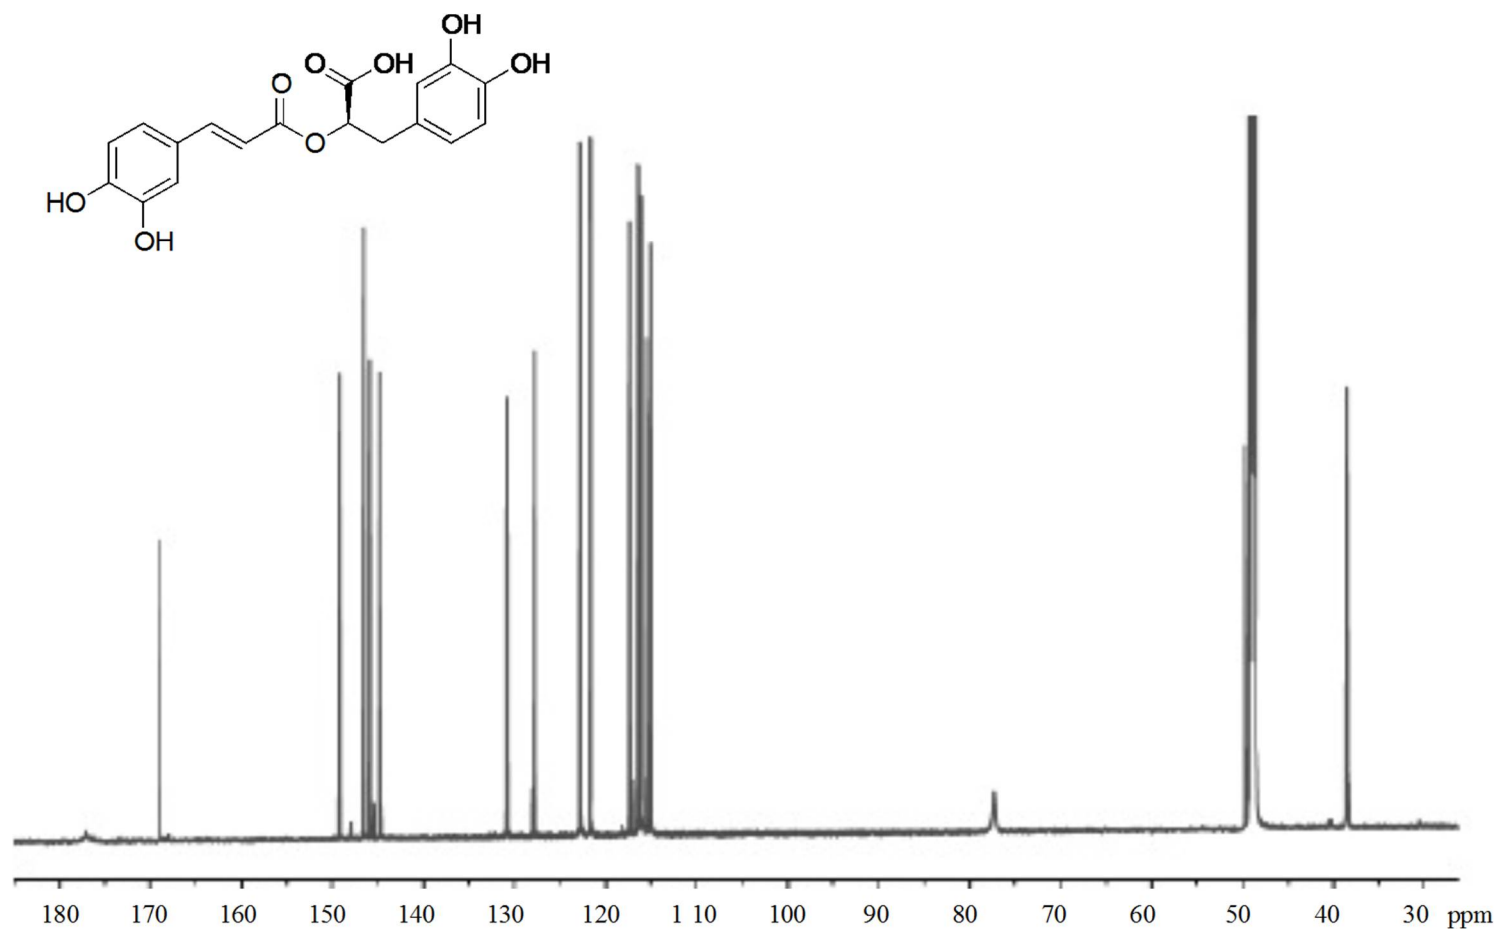

Figure S10.  $^1\text{H}$  NMR spectrum of Isoquercitrin (compound **6**, 700 MHz,  $\text{CD}_3\text{OD}$ )

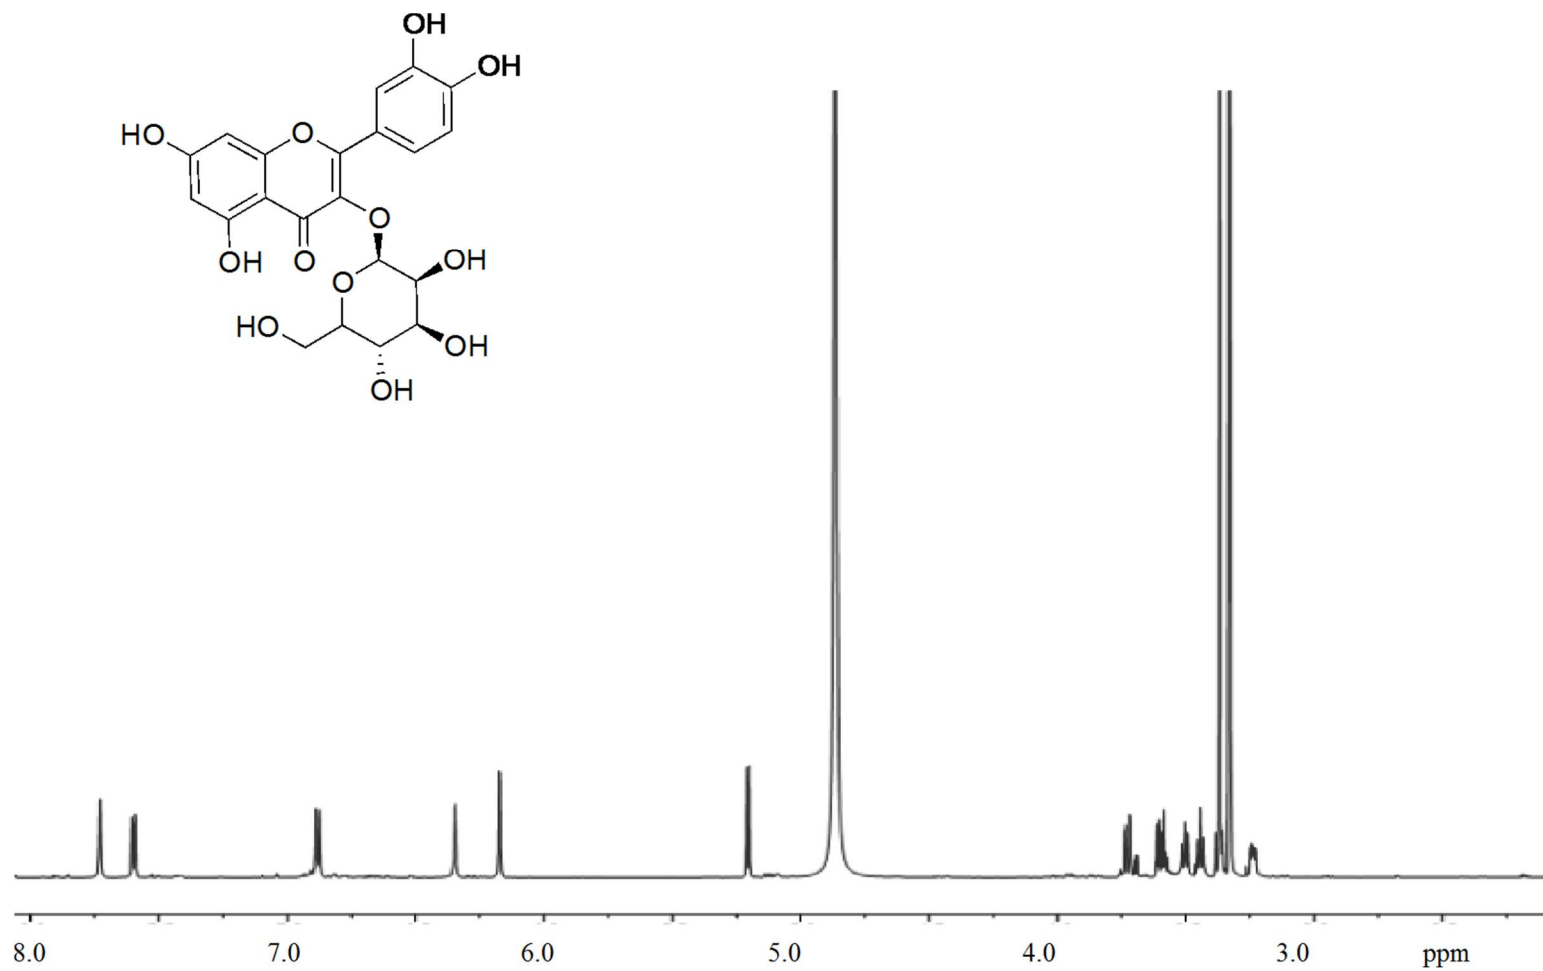

Figure S11.  $^{13}\text{C}$  NMR spectrum of Isoquercitrin (compound **6**, 175 MHz,  $\text{CD}_3\text{OD}$ )

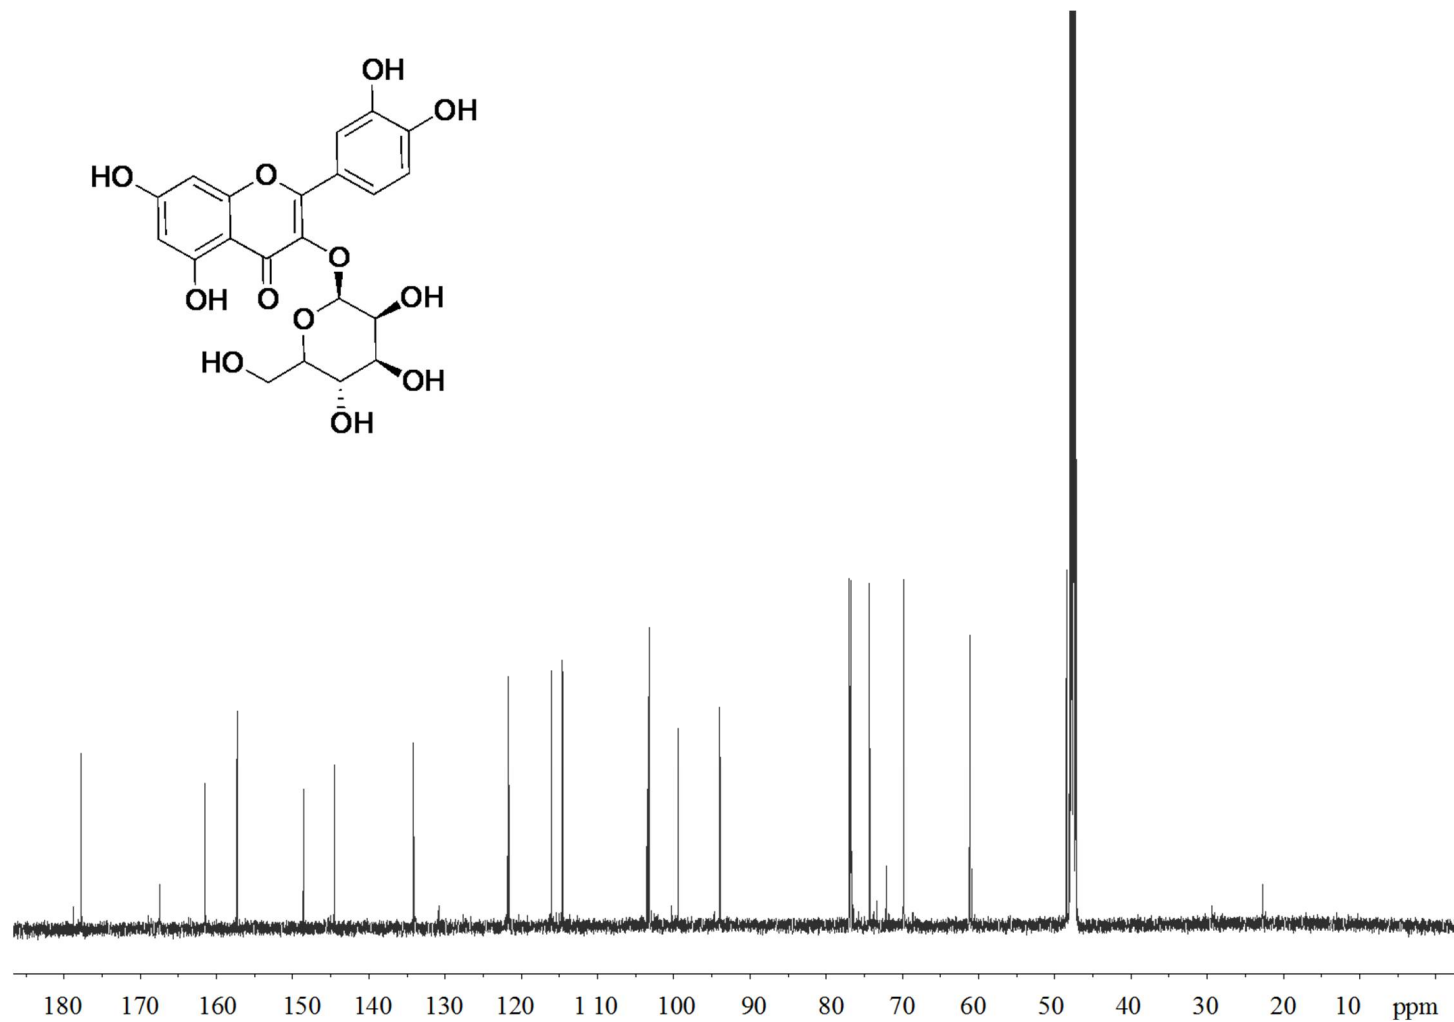



Figure S12. IR spectrum of Amarisolide G (compound **8a,b**)

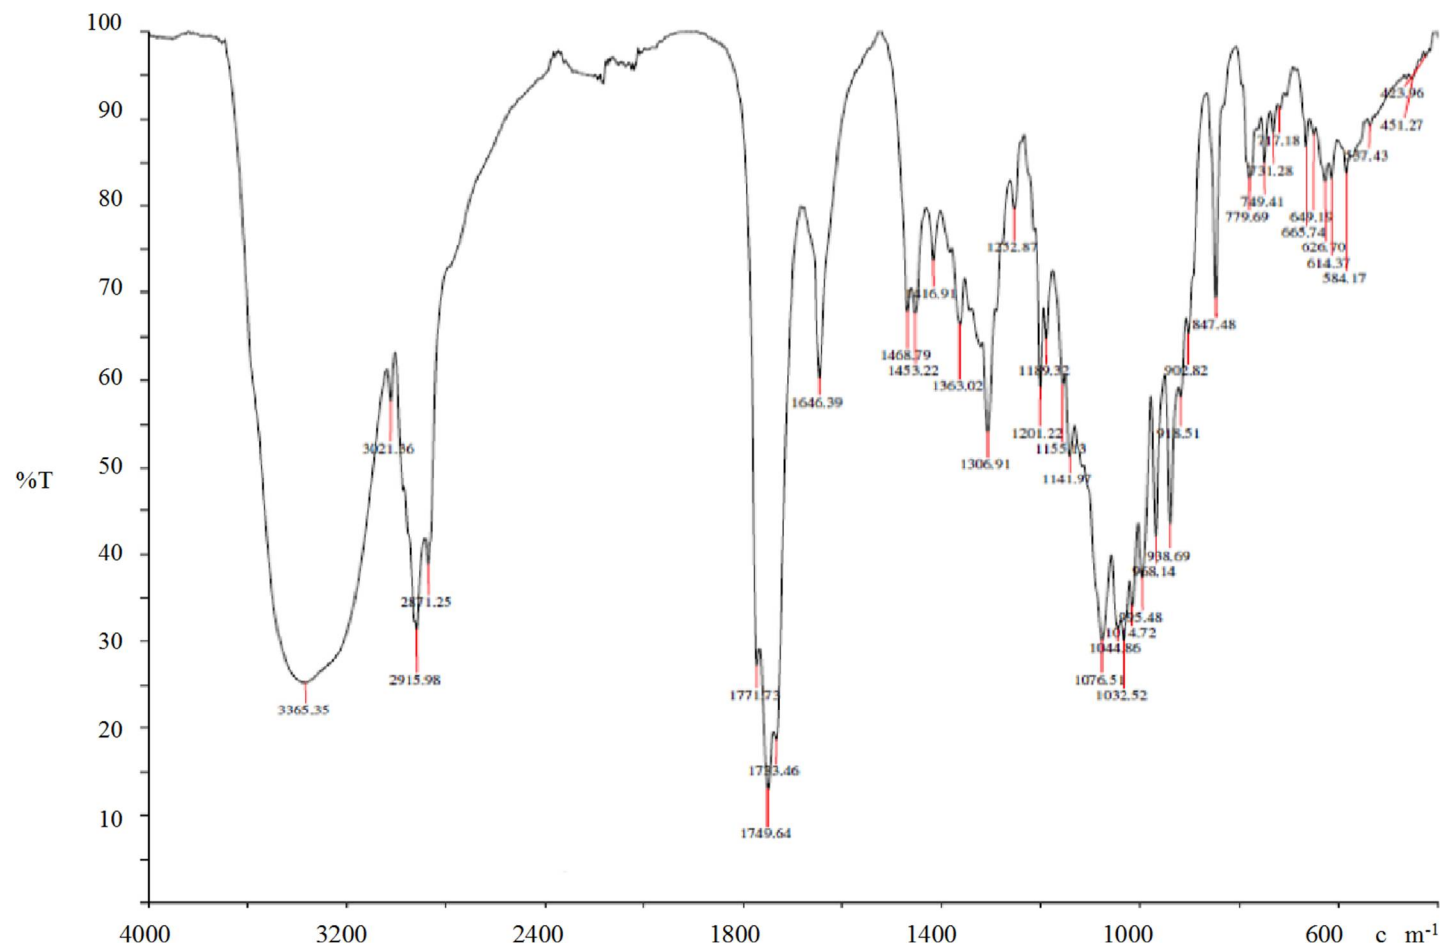

Figure S13.  $^1\text{H}$  NMR spectrum of Amarisolide G (compound **8a,b**, 700 MHz,  $\text{DMSO-}d_6$ )

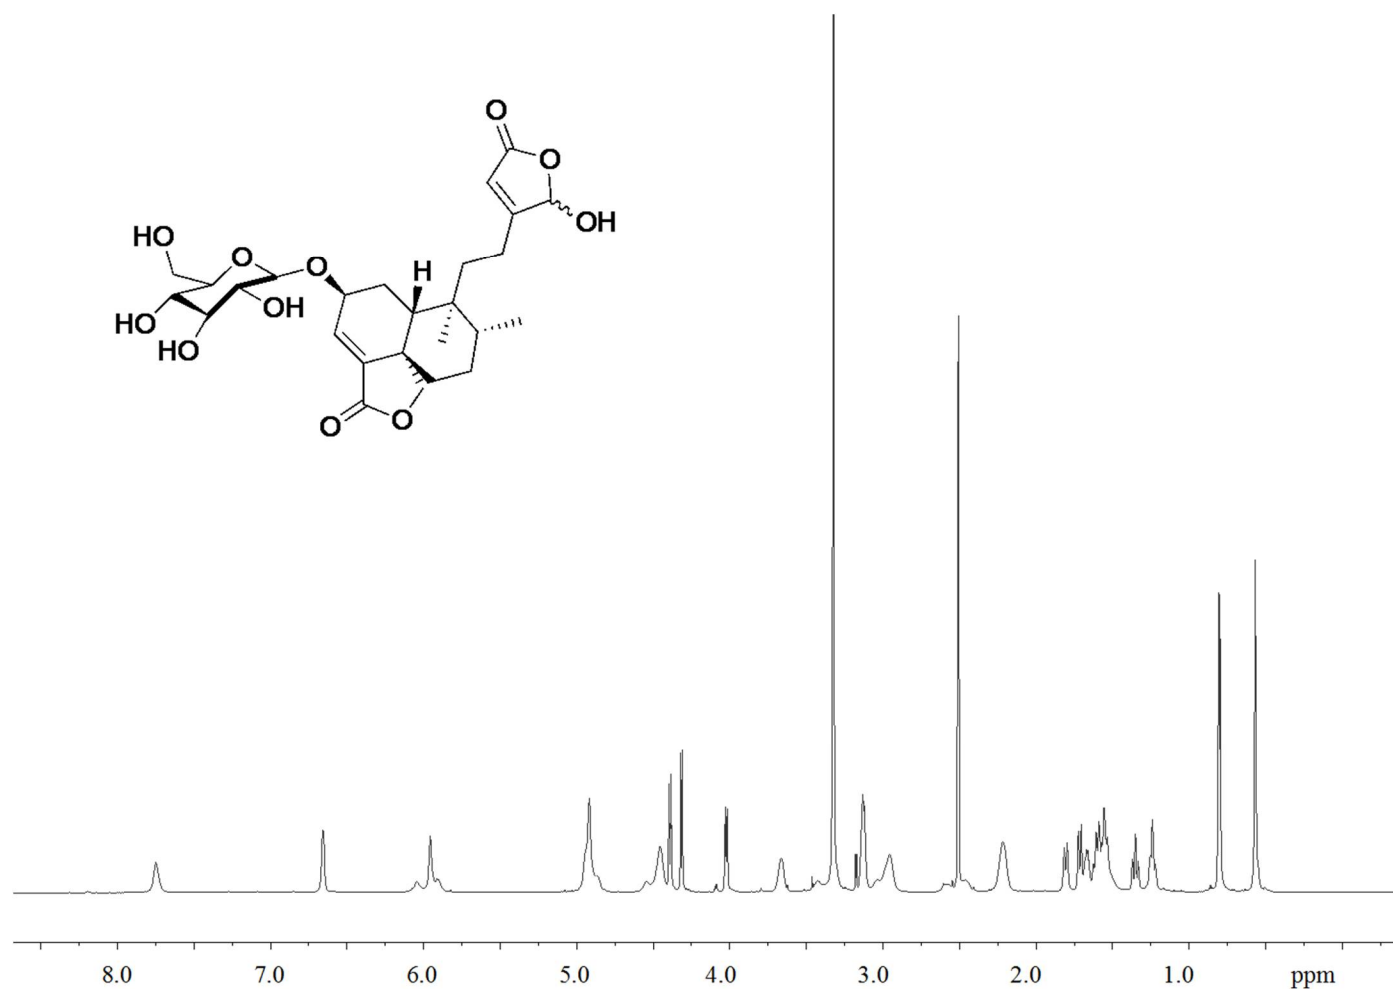

Figure S14.  $^{13}\text{C}$  NMR spectrum of Amarisolide G (compound **8a,b**, 175 MHz,  $\text{DMSO-}d_6$ )

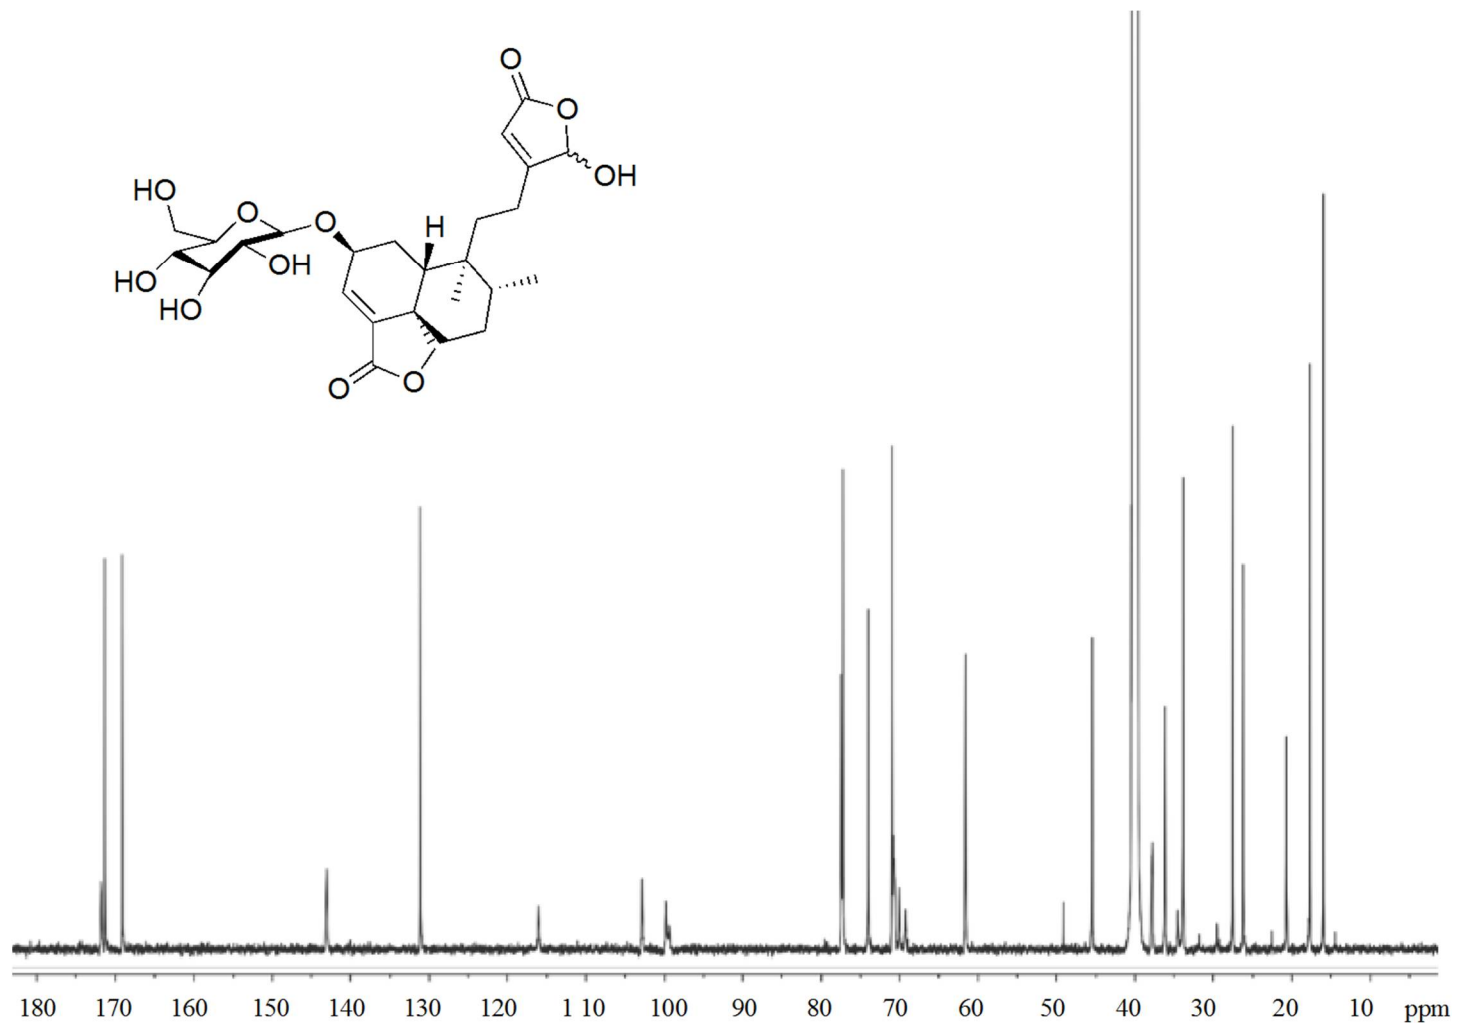

Figure S15.  $^1\text{H}$ - $^1\text{H}$  COSY spectrum of Amarisolide G (compound **8a,b**)

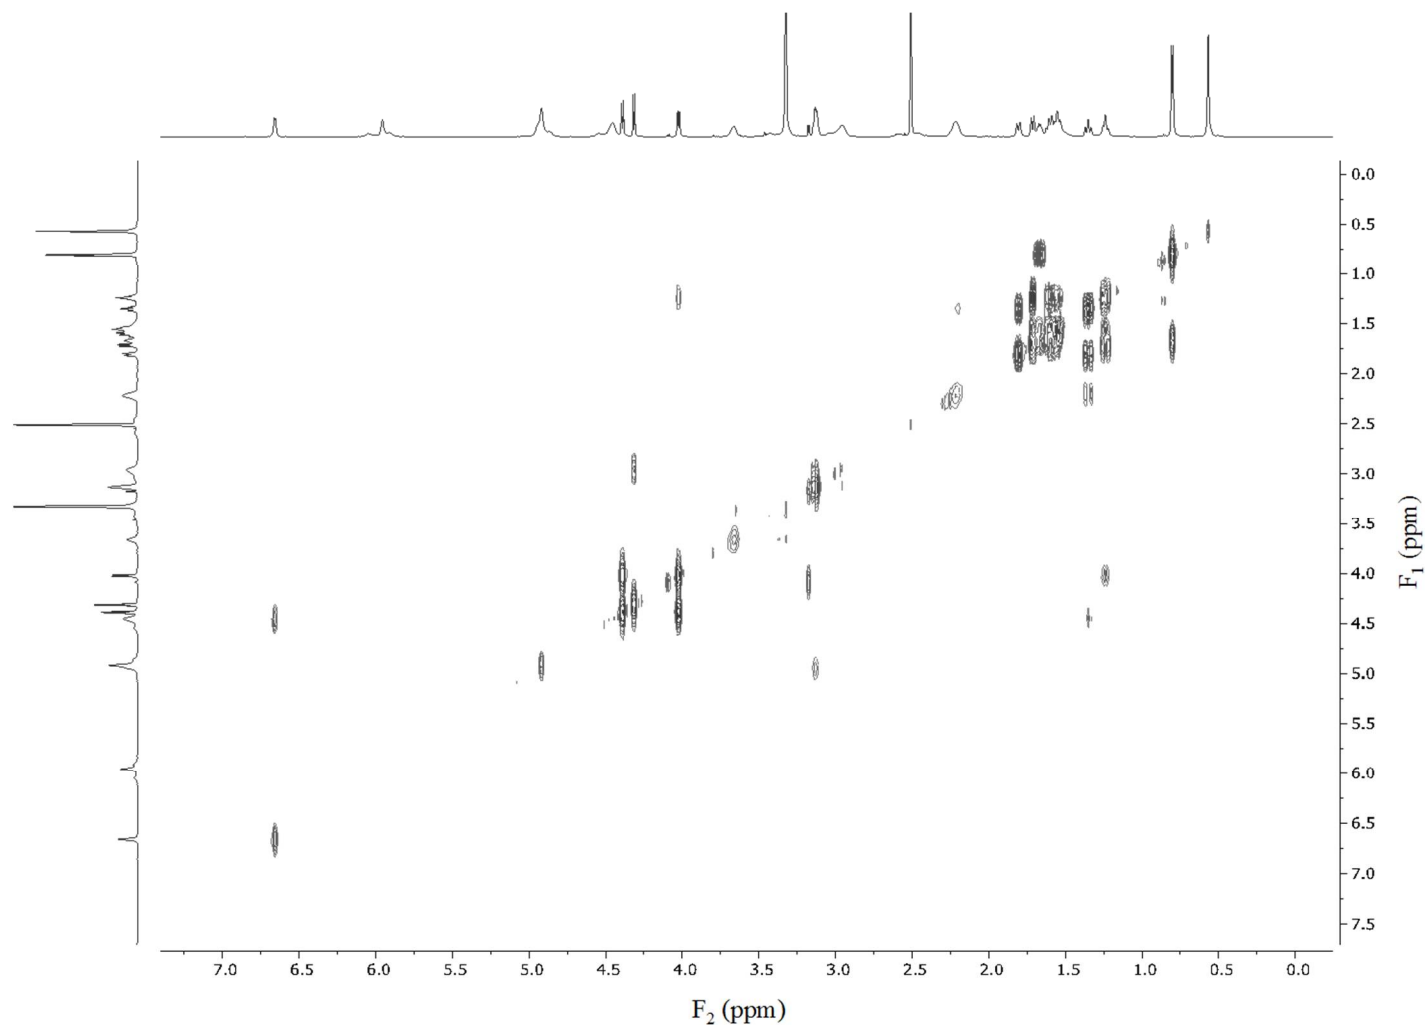

Figure S16.  $^1\text{H}$ - $^{13}\text{C}$  HSQC spectrum of Amarisolide G (compound **8a,b**)

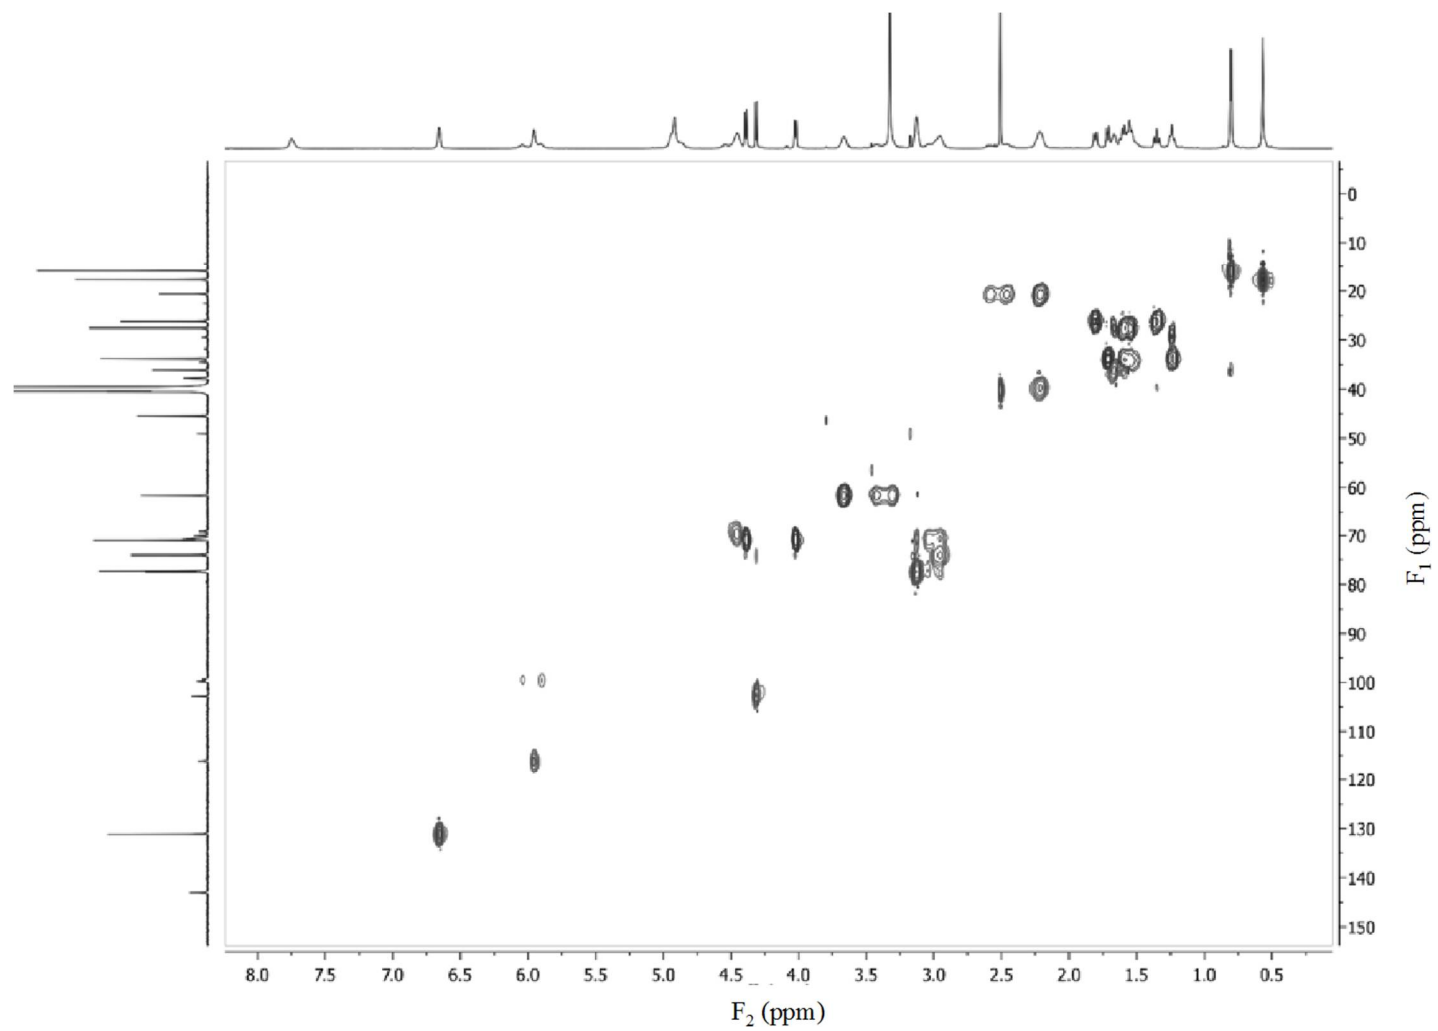

Figure S17.  $^1\text{H}$ - $^{13}\text{C}$  HMBC spectrum of Amarisolide G (compound **8a,b**)

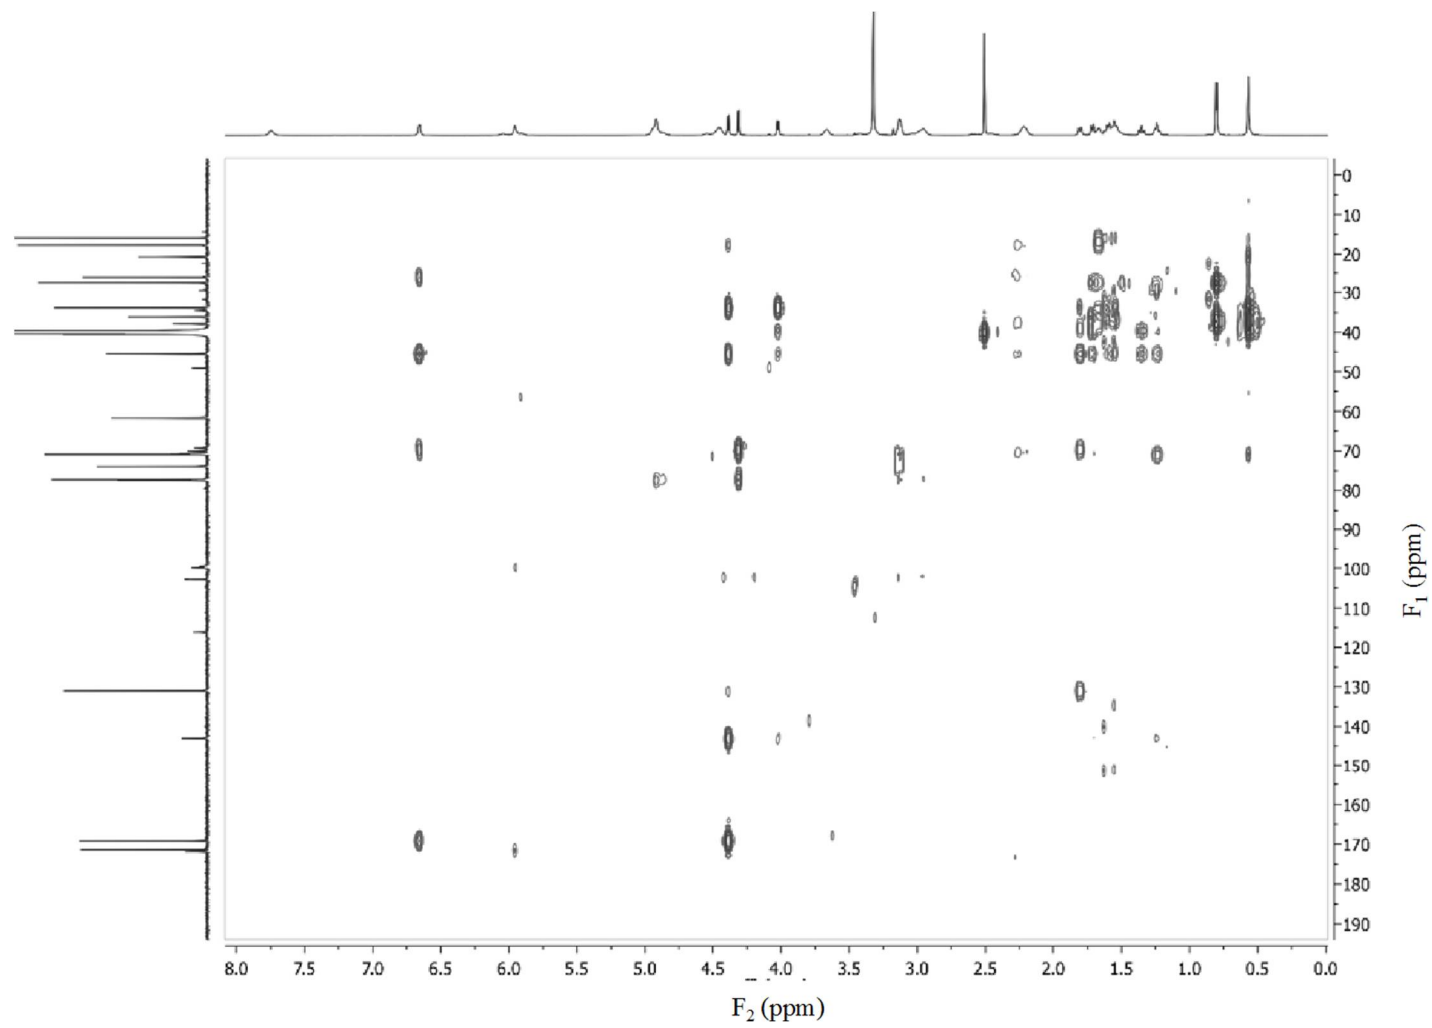

Figure S18. TOCSY spectrum of Amarisolide G (compound **8a,b**)

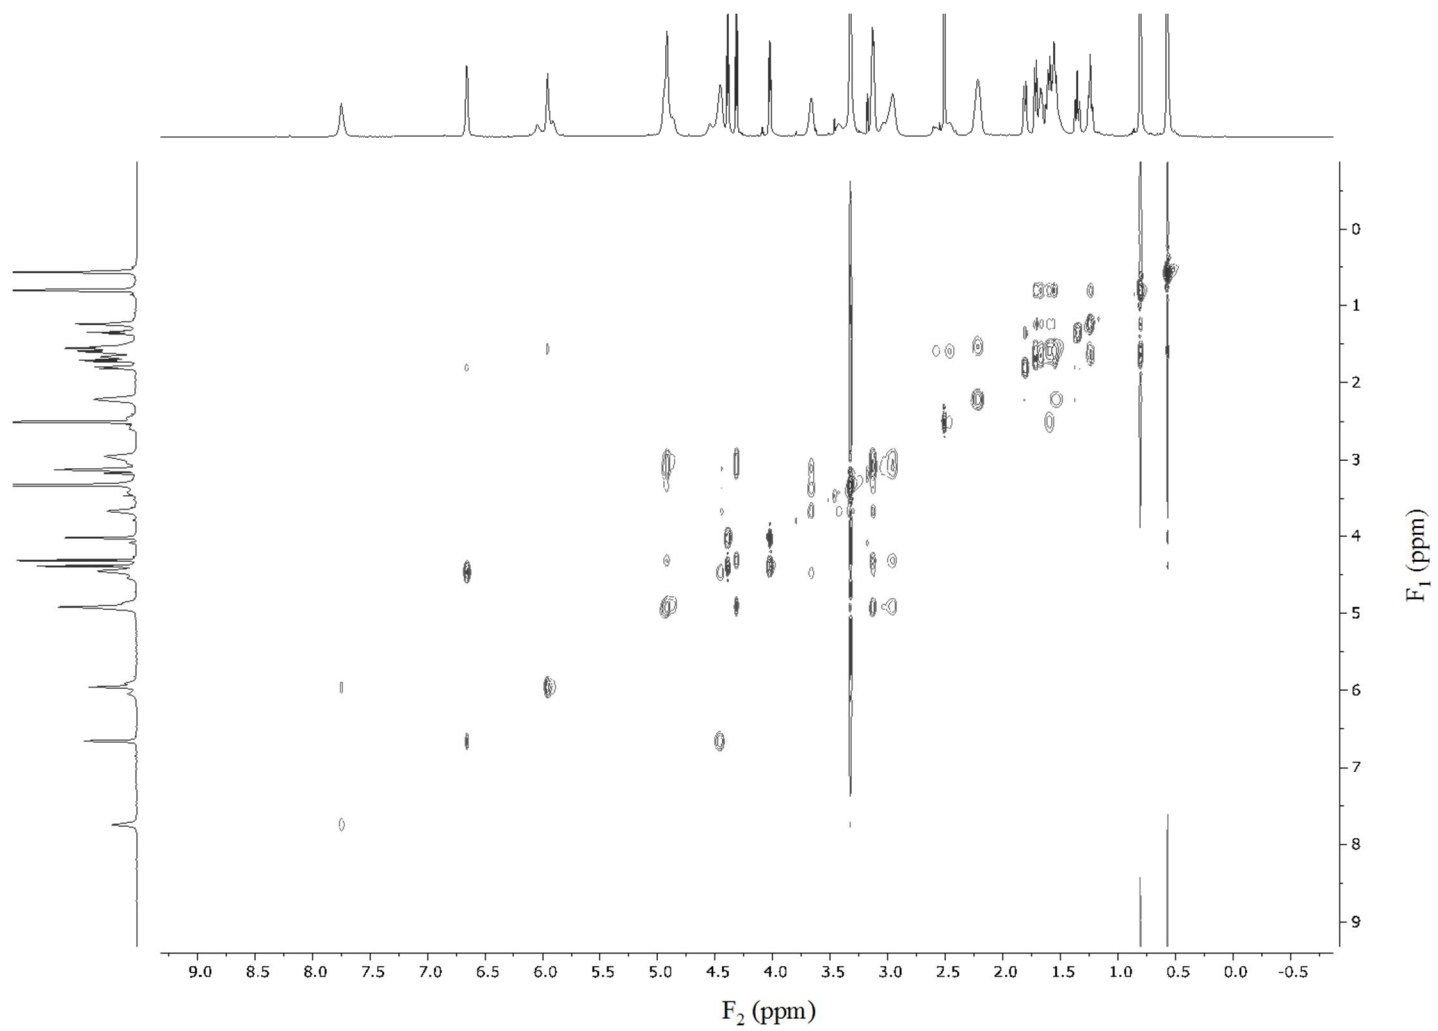

Figure S19. Total ion current chromatogram of the essential oil of *S. amarissima* (Sa-Batch 1). Peak identification: **10**, (*E*)-Pinocarvyl acetate; **11**,  $\delta$ -elemene; **12**,  $\alpha$ -bourbonene; **13**,  $\beta$ -caryophyllene; **14**,  $\alpha$ -caryophyllene; **15**, germacrene D; **16**,  $\beta$ -selinene; **17**, spathulenol.

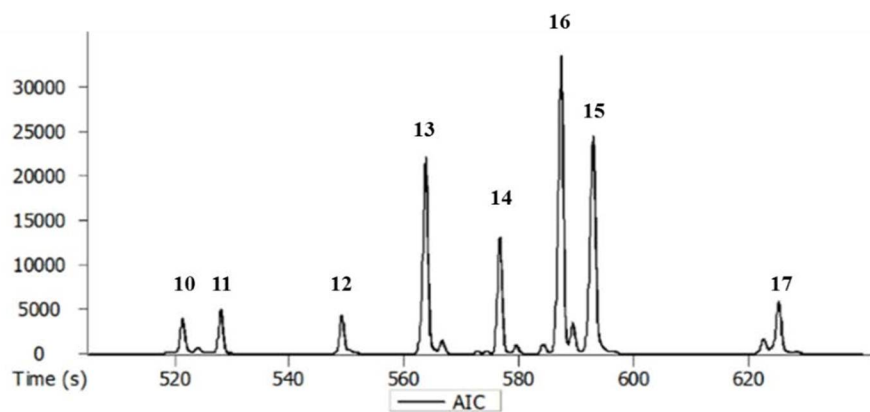



Figure S20. Total ion current chromatogram of the essential oil of *S. amarissima* (Sa-Batch 1). Peak identification: **9**, 3-Methoxy-*p*-cymene; **10**, (*E*)-pinocarvyl acetate; **12**,  $\alpha$ -bourbonene; **13**,  $\beta$ -caryophyllene; **14**,  $\alpha$ -caryophyllene; **15**, germacrene D; **16**,  $\beta$ -selinene; **17**, spathulenol.

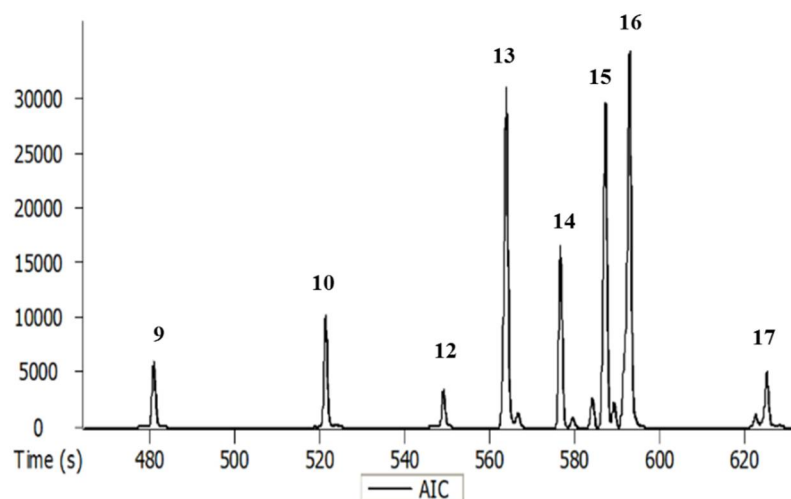

Figure S21. EIMS spectrum of 3-Methoxy-*p*-cymene (compound **9**)

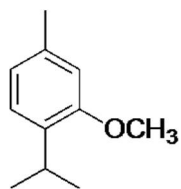

| Similarity | $T_R$ (s) | $R_I$<br>(experimental) | $R_I$<br>(literature) | Area (%) | Formula                           | Molecular Weight |
|------------|-----------|-------------------------|-----------------------|----------|-----------------------------------|------------------|
| 978        | 480.894   | 1219                    | 1215                  | 4.40     | C <sub>11</sub> H <sub>16</sub> O | 164              |

Peak True - sample "RM8AEPS:1", peak 1, at 480.894 s

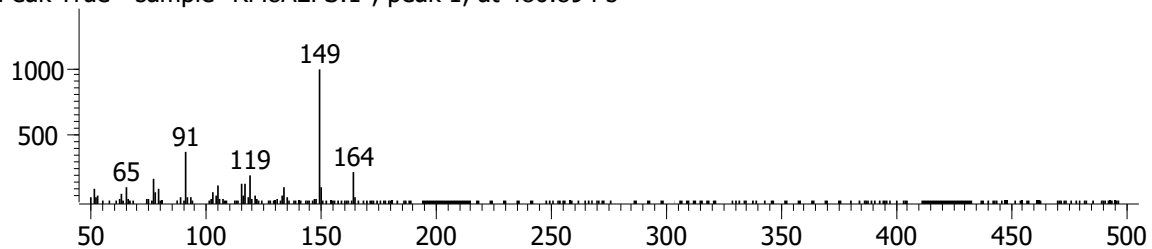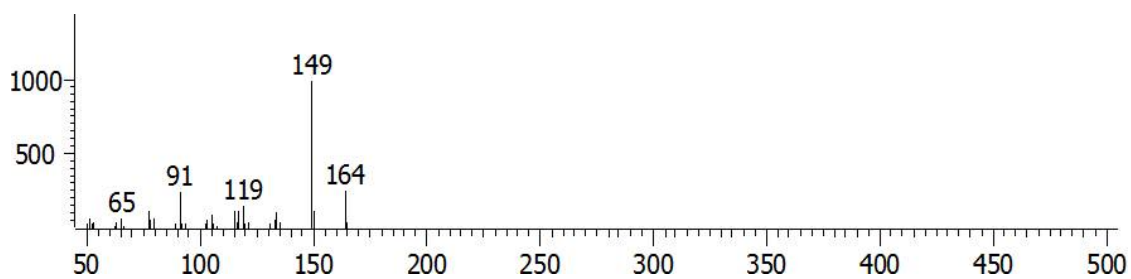

Figure S22. EIMS spectrum of (*E*)-Pinocarvyl acetate (compound **10**)

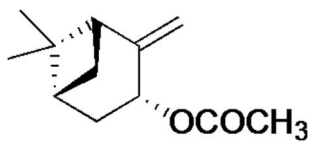

| Similarity | $T_R$ (s) | $R_I$<br>(experimental) | $R_I$<br>(literature) | Area (%) | Formula                                        | Molecular<br>Weight |
|------------|-----------|-------------------------|-----------------------|----------|------------------------------------------------|---------------------|
| 910        | 521.365   | 1313                    | 1312                  | 5.98     | C <sub>12</sub> H <sub>18</sub> O <sub>2</sub> | 194                 |

Peak True - sample "RM8AEPF:1", peak 1, at 521.365 s

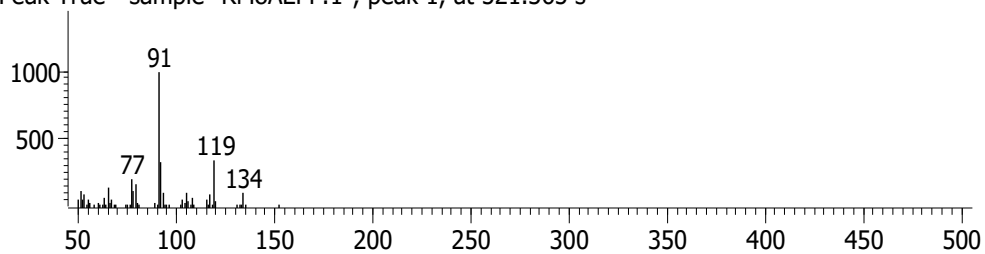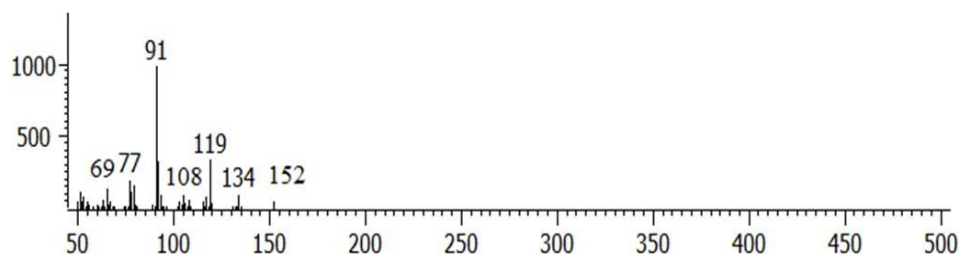

Figure S23. EIMS spectrum of  $\delta$ -Elemene (compound **11**)

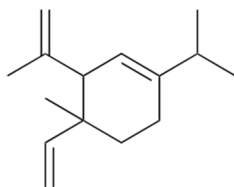

| Similarity | $T_R$ (s) | $R_I$<br>(experimental) | $R_I$<br>(literature) | Area (%) | Formula                         | Molecular Weight |
|------------|-----------|-------------------------|-----------------------|----------|---------------------------------|------------------|
| 900        | 528.065   | 1329                    | 1326                  | 1.99     | C <sub>15</sub> H <sub>24</sub> | 204.35           |

Peak True - sample "RM8AEPF:1", peak 2, at 528.065 s

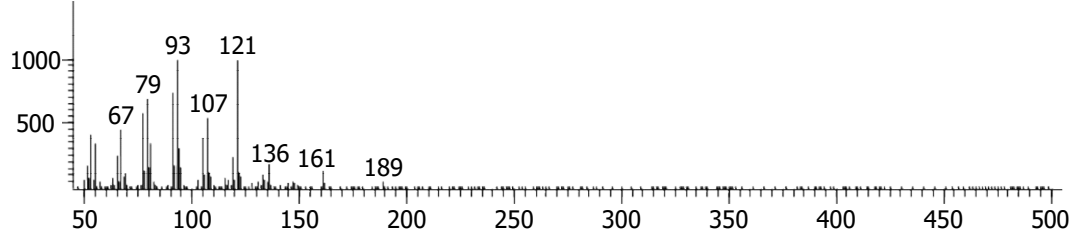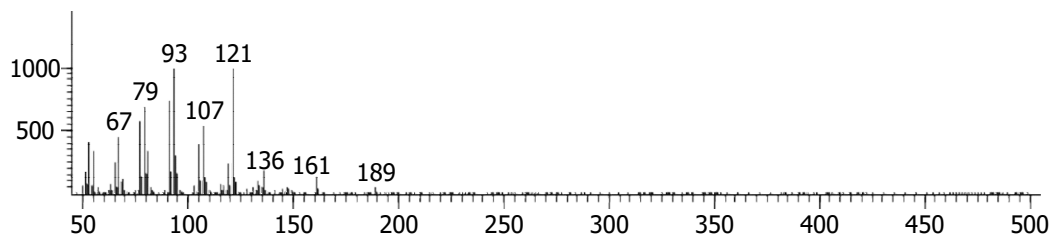

Figure S24. EIMS spectrum of  $\alpha$ -Bourbonene (compound **12**)

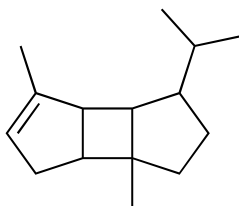

| Similarity | $T_R$ (s) | $R_I$<br>(experimental) | $R_I$<br>(literature) | Area (%) | Formula                         | Molecular<br>Weight |
|------------|-----------|-------------------------|-----------------------|----------|---------------------------------|---------------------|
| 900        | 549.165   | 1378                    | 1374                  | 4.24     | C <sub>15</sub> H <sub>24</sub> | 204.35              |

Peak True - sample "RM8AEPF:1", peak 3, at 549.165 s

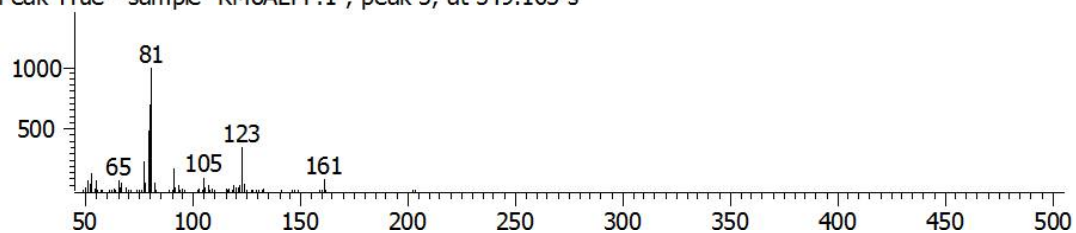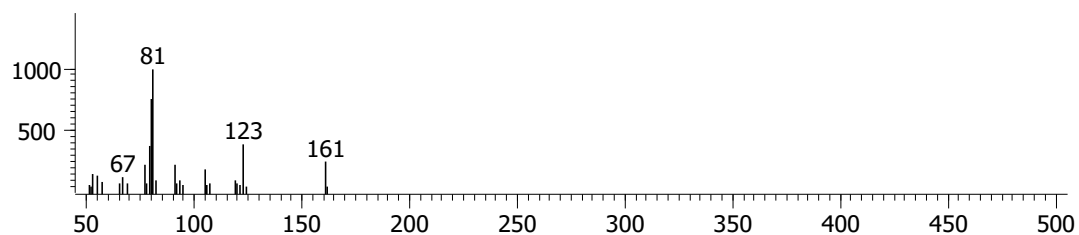

Figure S25. EIMS spectrum of  $\beta$ -Caryophyllene (compound **13**)

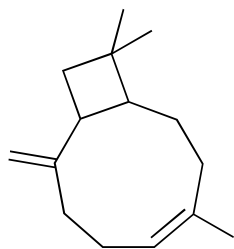

| Similarity | $T_R$ (s) | $R_I$<br>(experimental) | $R_I$<br>(literature) | Area (%) | Formula                         | Molecular<br>Weight |
|------------|-----------|-------------------------|-----------------------|----------|---------------------------------|---------------------|
| 933        | 563.765   | 1413                    | 1414                  | 15.05    | C <sub>15</sub> H <sub>24</sub> | 204.35              |

Peak True - sample "RM8AEPF:1", peak 4, at 563.765 s

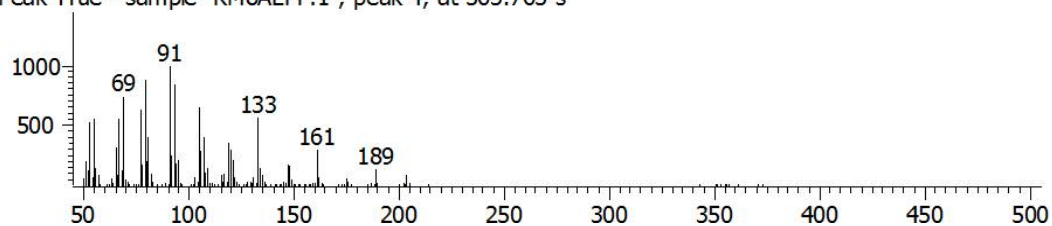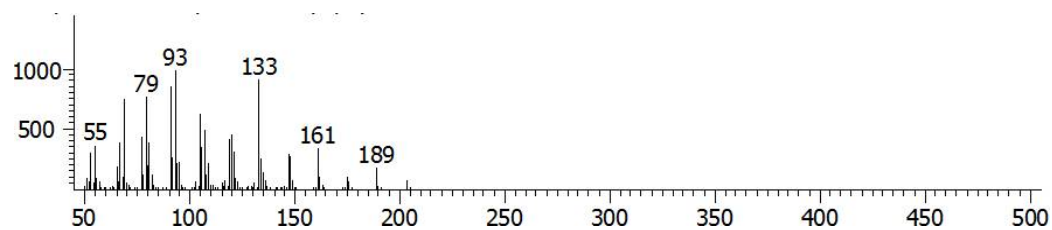

Figure S26. EIMS spectrum of  $\alpha$ -Caryophyllene (compound **14**)

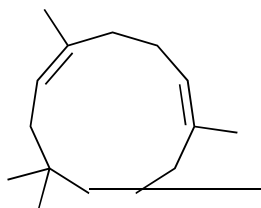

| Similarity | $T_R$ (s) | $R_I$<br>(experimental) | $R_I$<br>(literature) | Area (%) | Formula                         | Molecular Weight |
|------------|-----------|-------------------------|-----------------------|----------|---------------------------------|------------------|
| 910        | 576.665   | 1447                    | 1446                  | 7.68     | C <sub>15</sub> H <sub>24</sub> | 204.35           |

Peak True - sample "RM8AEPF:1", peak 5, at 576.665 s

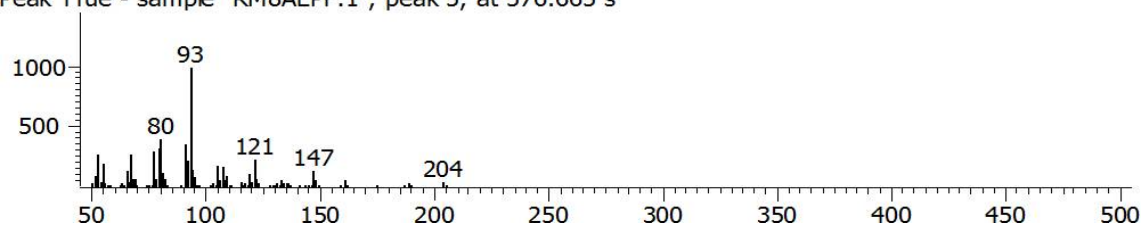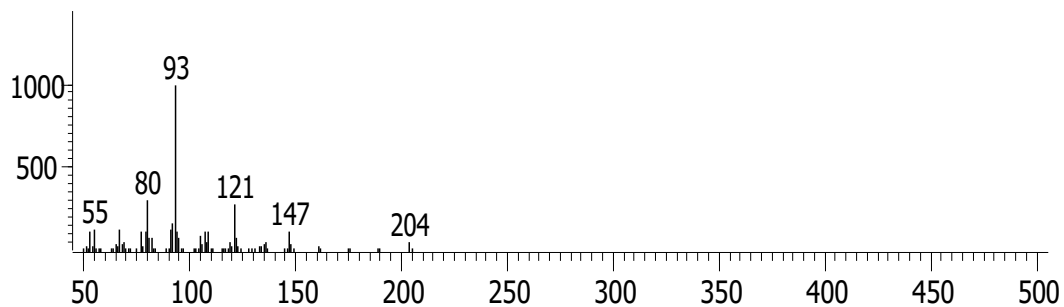

Figure S27. EIMS spectrum of Germacrene D (compound **15**)

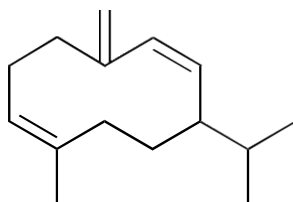

| Similarity | $T_R$ (s) | $R_I$<br>(experimental) | $R_I$<br>(literature) | Area (%) | Formula                         | Molecular<br>Weight |
|------------|-----------|-------------------------|-----------------------|----------|---------------------------------|---------------------|
| 910        | 587.365   | 1476                    | 1476                  | 25.09    | C <sub>15</sub> H <sub>24</sub> | 204.35              |

Peak True - sample "RM8AEPF:1", peak 6, at 587.365 s

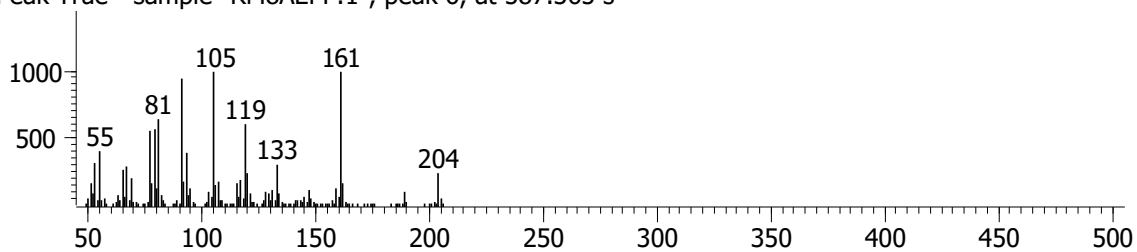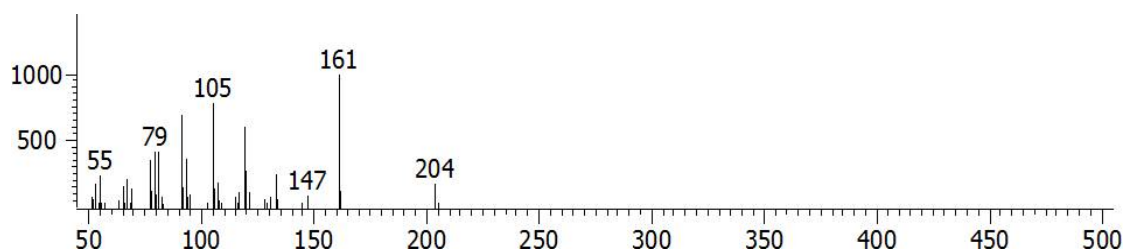



Figure S28. EIMS spectrum of  $\beta$ -Selinene (compound **16**)

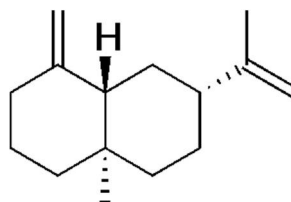

| Similarity | $T_R$ (s) | $R_I$<br>(experimental) | $R_I$<br>(literature) | Area (%) | Formula                         | Molecular Weight |
|------------|-----------|-------------------------|-----------------------|----------|---------------------------------|------------------|
| 980        | 592.965   | 1491                    | 1489                  | 28.35    | C <sub>15</sub> H <sub>24</sub> | 204.35           |

Peak True - sample "RM8AEPF:1", peak 7, at 592.965 s

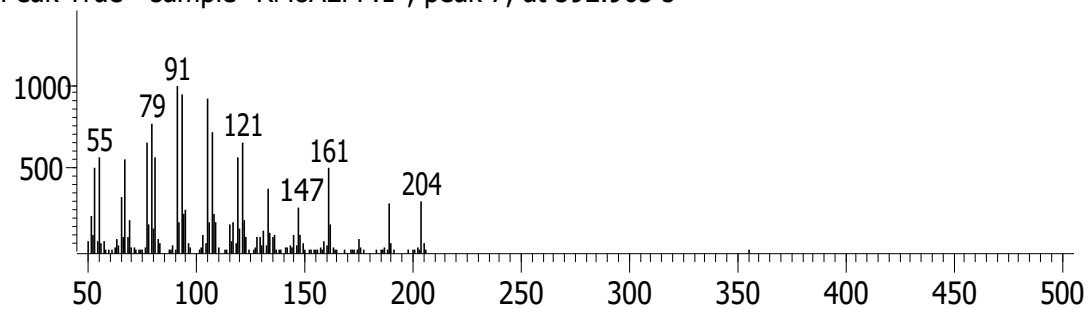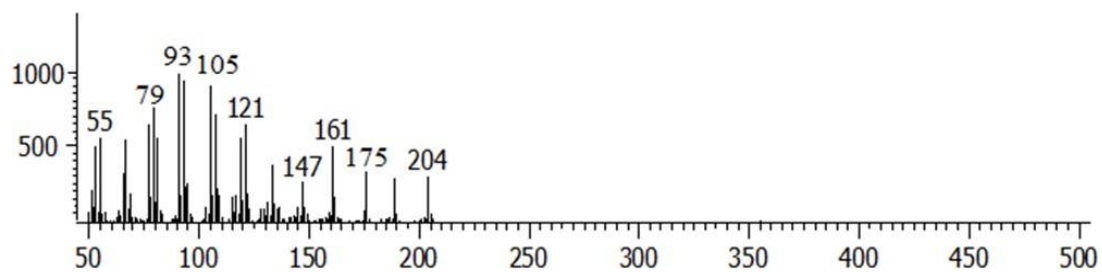

Figure S29. EIMS spectrum of Spathulenol (compound 17)

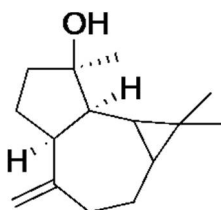

| Similarity | $T_R$ (s) | $R_I$<br>(experimental) | $R_I$<br>(literature) | Area (%) | Formula                           | Molecular Weight |
|------------|-----------|-------------------------|-----------------------|----------|-----------------------------------|------------------|
| 999        | 625.265   | 1576                    | 1576                  | 11.59    | C <sub>15</sub> H <sub>24</sub> O | 220              |

Peak True - sample "RM8AEPF:1", peak 8, at 625.265 s

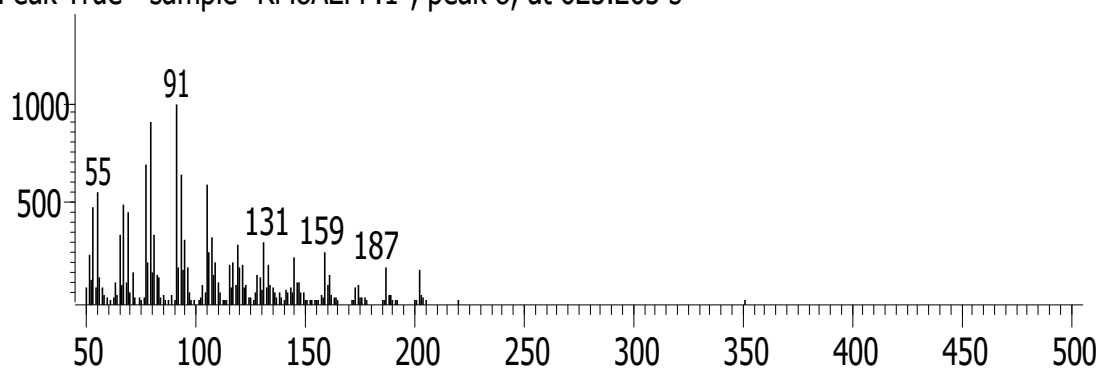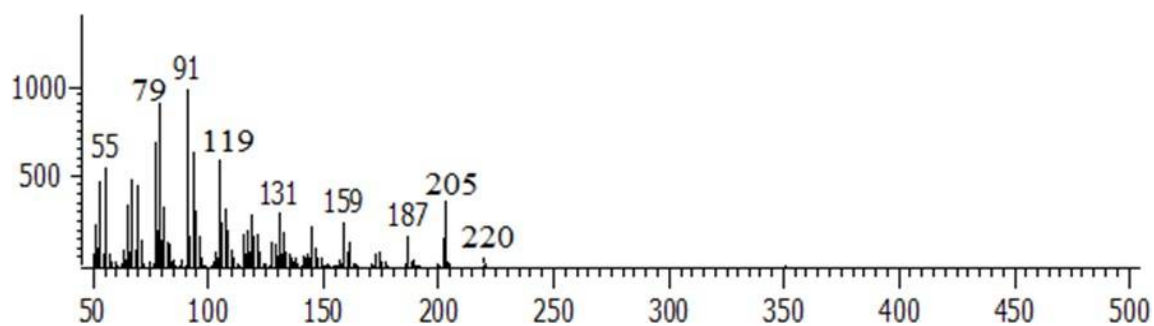

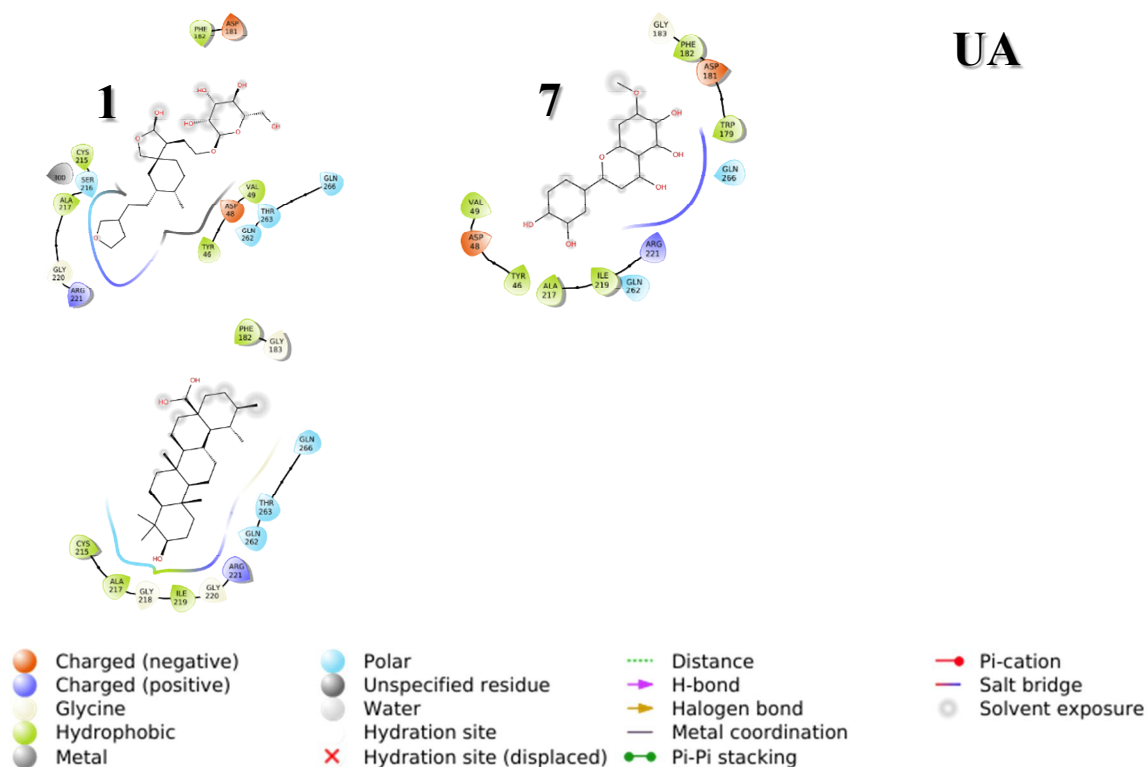

Figure S30. Residues of interaction to 4 Å of compounds **1**, **7** and **UA** at the catalytic site of PTP1B.

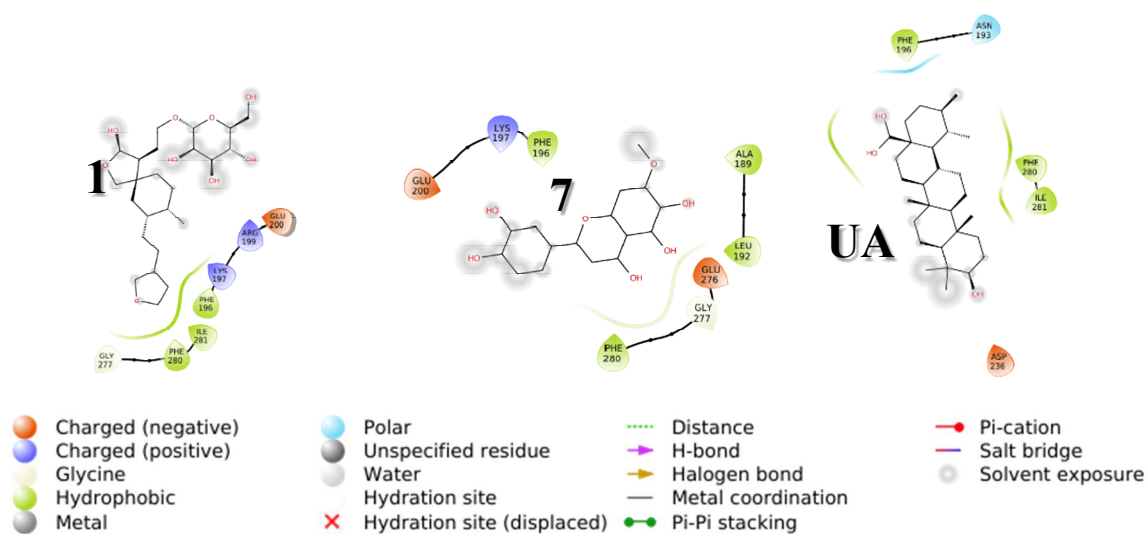

Figure S31. Residues of interaction to 4 Å of compounds **1**, **7** and **UA** at the allosteric site of PTP1B.

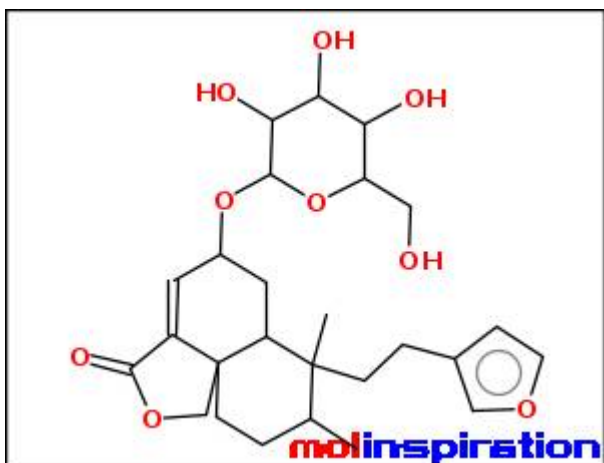

[Molinspiration bioactivity score](#) v2018.03

GPCR ligand

0.49

Ion channel modulator

0.36

Kinase inhibitor

0.08

Nuclear receptor ligand

0.48

Protease inhibitor

0.28

Enzyme inhibitor

0.71

[Get data as text](#) (for copy / paste).

[Get 3D geometry](#) BETA

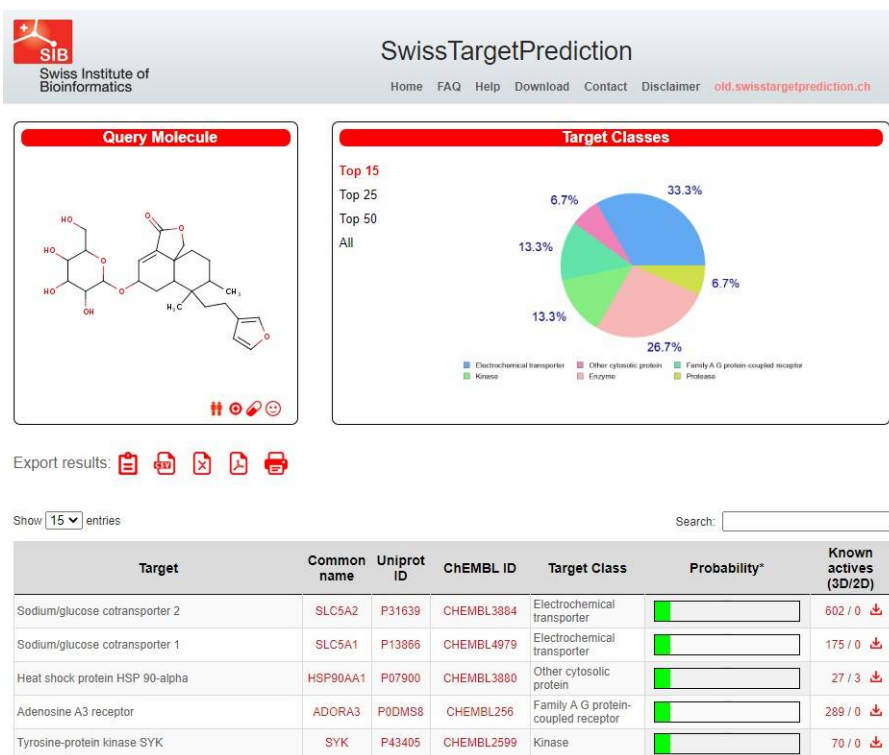

Figure S32. Prediction of biological properties of compounds **1**, using servers Molinspiration and server Swiss TargetPrediction.

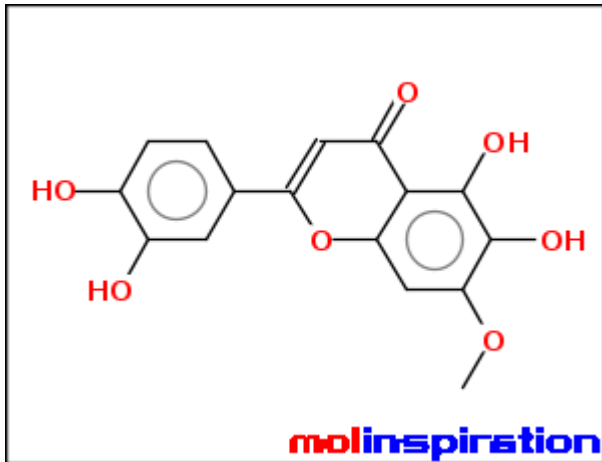

[Molinspiration bioactivity score v2018.03](#)

GPCR ligand -  
0.10  
Ion channel modulator -  
0.24  
Kinase inhibitor  
0.24  
Nuclear receptor ligand  
0.18  
Protease inhibitor -  
0.32  
Enzyme inhibitor  
0.19

[Get data as text](#) (for copy / paste).

[Get 3D geometry](#) BETA

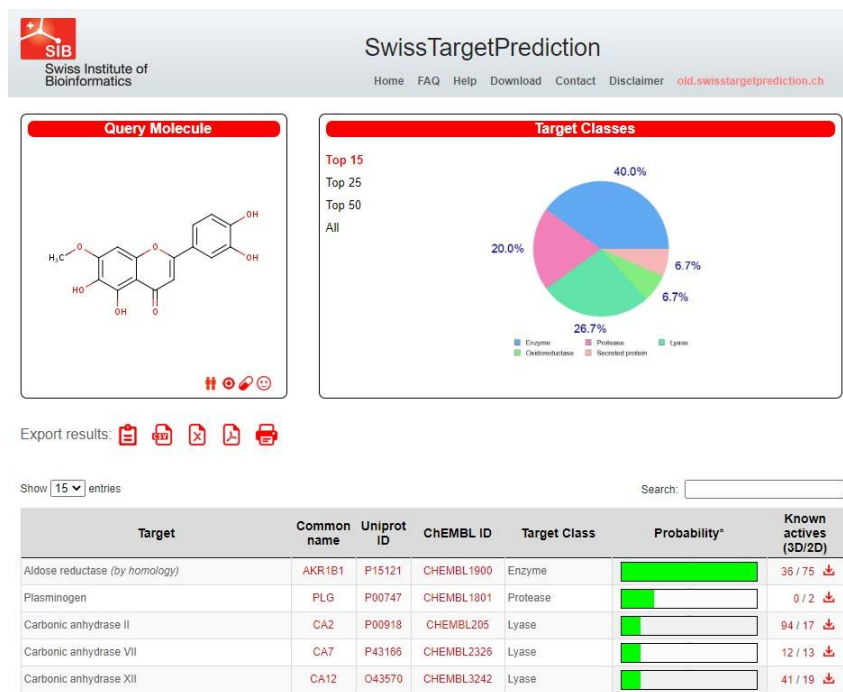

Figure S33. Prediction of biological properties of compounds 7, using servers Molinspiration and server Swiss TargetPrediction.

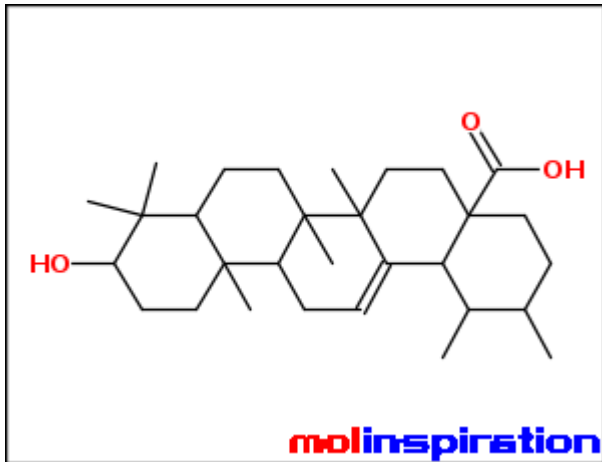

[Molinspiration bioactivity score v2018.03](#)

GPCR ligand  
0.28  
Ion channel modulator -  
0.03  
Kinase inhibitor -  
0.50  
Nuclear receptor ligand  
0.89  
Protease inhibitor  
0.23  
Enzyme inhibitor  
0.69

[Get data as text](#) (for copy / paste).

[Get 3D geometry](#) BETA

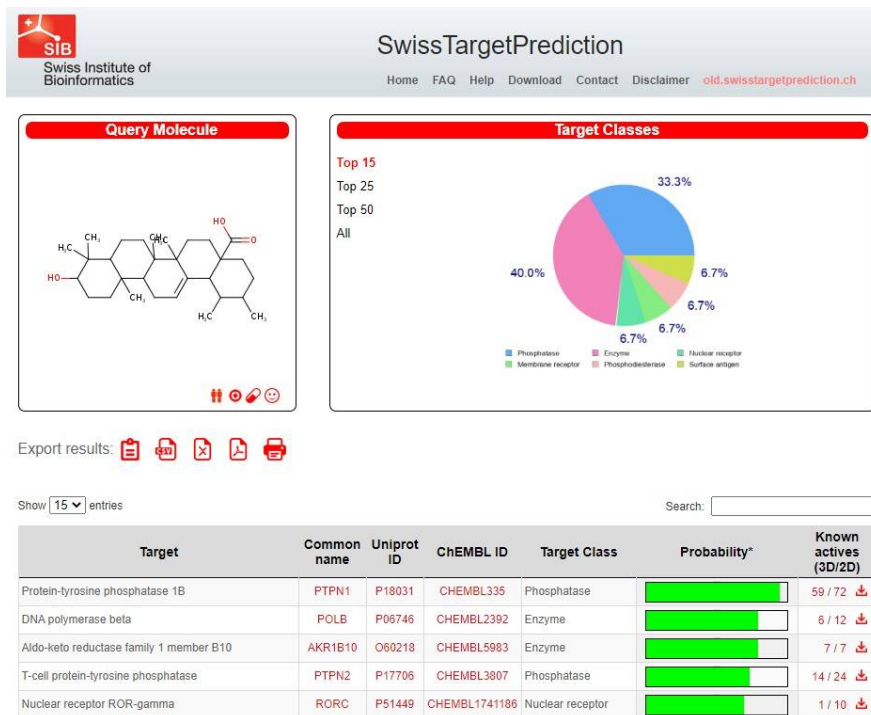

Figure S34. Prediction of biological properties of compounds AU, using servers Molinspiration and server Swiss TargetPrediction.
